# Supplementary material
Source: MDPI journal article supplement (https://www.mdpi.com/2304-6740/6/1/9)

# checkCIF/PLATON report

You have not supplied any structure factors. As a result the full set of tests cannot be run.

THIS REPORT IS FOR GUIDANCE ONLY. IF USED AS PART OF A REVIEW PROCEDURE FOR PUBLICATION, IT SHOULD NOT REPLACE THE EXPERTISE OF AN EXPERIENCED CRYSTALLOGRAPHIC REFEREE.

No syntax errors found.      CIF dictionary      Interpreting this report

## Datablock: 2-open

---

|                 |                              |                                |
|-----------------|------------------------------|--------------------------------|
| Bond precision: | C-C = 0.0183 A               | Wavelength=0.71073             |
| Cell:           | a=28.340(4)                  | b=12.5017(16)      c=26.031(3) |
|                 | alpha=90                     | beta=112.042(1)      gamma=90  |
| Temperature:    | 93 K                         |                                |
|                 | Calculated                   | Reported                       |
| Volume          | 8548.6(19)                   | 8548.7(18)                     |
| Space group     | C 2/c                        | C 2/c                          |
| Hall group      | -C 2yc                       | -C 2yc                         |
| Moiety formula  | C65 H34 Dy2 F36 N4 O12 S2, ? |                                |
|                 | C5 H11, 2(C H2.50)           |                                |
| Sum formula     | C72 H50 Dy2 F36 N4 O12 S2    | C72 H50 Dy2 F36 N4 O12 S2      |
| Mr              | 2236.28                      | 2236.28                        |
| Dx,g cm-3       | 1.738                        | 1.738                          |
| Z               | 4                            | 4                              |
| Mu (mm-1)       | 1.921                        | 1.921                          |
| F000            | 4376.0                       | 4376.0                         |
| F000'           | 4378.96                      |                                |
| h,k,lmax        | 32,14,29                     | 32,14,29                       |
| Nref            | 6659                         | 6583                           |
| Tmin,Tmax       | 0.955,0.962                  | 0.750,1.000                    |
| Tmin'           | 0.681                        |                                |

Correction method= # Reported T Limits: Tmin=0.750 Tmax=1.000  
AbsCorr = MULTI-SCAN

Data completeness= 0.989      Theta(max)= 23.925

R(reflections)= 0.0784( 4881)      wR2(reflections)= 0.2358( 6583)

S = 1.033      Npar= 709

---

The following ALERTS were generated. Each ALERT has the format

**test-name\_ALERT\_alert-type\_alert-level.**

Click on the hyperlinks for more details of the test.

---

### Alert level A

|                                                   |                             |            |
|---------------------------------------------------|-----------------------------|------------|
| PLAT213_ALERT_2_A Atom F17A                       | has ADP max/min Ratio ..... | 9.4 prolat |
| PLAT213_ALERT_2_A Atom C31A                       | has ADP max/min Ratio ..... | 6.3 prolat |
| PLAT234_ALERT_4_A Large Hirshfeld Difference F13B | -- C29B                     | 0.35 Ang.  |

---

### Alert level B

THETM01\_ALERT\_3\_B The value of sine(theta\_max)/wavelength is less than 0.575  
Calculated sin(theta\_max)/wavelength = 0.5706

|                                                                    |                             |             |
|--------------------------------------------------------------------|-----------------------------|-------------|
| PLAT213_ALERT_2_B Atom O6A                                         | has ADP max/min Ratio ..... | 4.3 prolat  |
| PLAT213_ALERT_2_B Atom C32A                                        | has ADP max/min Ratio ..... | 5.0 prolat  |
| PLAT220_ALERT_2_B Non-Solvent Resd 1 C                             | Ueq(max)/Ueq(min) Range     | 10.0 Ratio  |
| PLAT220_ALERT_2_B Non-Solvent Resd 1 F                             | Ueq(max)/Ueq(min) Range     | 10.0 Ratio  |
| PLAT234_ALERT_4_B Large Hirshfeld Difference F5                    | -- C23_b                    | 0.28 Ang.   |
| PLAT241_ALERT_2_B High 'MainMol' Ueq as Compared to Neighbors of   | C21                         | Check       |
| PLAT780_ALERT_1_B Coordinates do not Form a Properly Connected Set |                             | Please Do ! |

---

### Alert level C

REFNR01\_ALERT\_3\_C Ratio of reflections to parameters is < 10 for a centrosymmetric structure  
sine(theta)/lambda 0.5706  
Proportion of unique data used 1.0000  
Ratio reflections to parameters 9.2849

|                                                                    |                             |            |
|--------------------------------------------------------------------|-----------------------------|------------|
| PLAT088_ALERT_3_C Poor Data / Parameter Ratio .....                | 9.39                        | Note       |
| PLAT094_ALERT_2_C Ratio of Maximum / Minimum Residual Density .... | 2.23                        | Report     |
| PLAT162_ALERT_4_C Missing or Zero s.u. (esd) on y-coordinate for . | C50                         | Check      |
| PLAT163_ALERT_4_C Missing or Zero s.u. (esd) on z-coordinate for . | C50                         | Check      |
| PLAT213_ALERT_2_C Atom F4                                          | has ADP max/min Ratio ..... | 3.5 prolat |
| PLAT213_ALERT_2_C Atom F10                                         | has ADP max/min Ratio ..... | 3.9 prolat |
| PLAT213_ALERT_2_C Atom F12                                         | has ADP max/min Ratio ..... | 3.3 prolat |
| PLAT213_ALERT_2_C Atom F16B                                        | has ADP max/min Ratio ..... | 3.3 prolat |
| PLAT213_ALERT_2_C Atom F17B                                        | has ADP max/min Ratio ..... | 3.3 prolat |
| PLAT213_ALERT_2_C Atom C21                                         | has ADP max/min Ratio ..... | 3.6 prolat |
| PLAT213_ALERT_2_C Atom C29B                                        | has ADP max/min Ratio ..... | 3.5 prolat |
| PLAT213_ALERT_2_C Atom C33B                                        | has ADP max/min Ratio ..... | 3.5 prolat |
| PLAT220_ALERT_2_C Non-Solvent Resd 1 O                             | Ueq(max)/Ueq(min) Range     | 3.2 Ratio  |
| PLAT222_ALERT_3_C Non-Solv. Resd 1 H                               | Uiso(max)/Uiso(min) Range   | 4.6 Ratio  |
| PLAT234_ALERT_4_C Large Hirshfeld Difference Dy2A                  | -- O4                       | 0.18 Ang.  |
| PLAT234_ALERT_4_C Large Hirshfeld Difference Dy2A                  | -- N1                       | 0.17 Ang.  |
| PLAT234_ALERT_4_C Large Hirshfeld Difference N2                    | -- C6                       | 0.16 Ang.  |
| PLAT234_ALERT_4_C Large Hirshfeld Difference C30B                  | -- C31B                     | 0.24 Ang.  |
| PLAT241_ALERT_2_C High 'MainMol' Ueq as Compared to Neighbors of   | C17                         | Check      |
| PLAT242_ALERT_2_C Low 'MainMol' Ueq as Compared to Neighbors of    | C20                         | Check      |
| PLAT342_ALERT_3_C Low Bond Precision on C-C Bonds .....            | 0.01831                     | Ang.       |

---

### Alert level G

|                                                                    |        |        |
|--------------------------------------------------------------------|--------|--------|
| PLAT002_ALERT_2_G Number of Distance or Angle Restraints on AtSite | 26     | Note   |
| PLAT004_ALERT_5_G Polymeric Structure Found with Maximum Dimension | 1      | Info   |
| PLAT072_ALERT_2_G SHELXL First Parameter in WGHT Unusually Large   | 0.13   | Report |
| PLAT083_ALERT_2_G SHELXL Second Parameter in WGHT Unusually Large  | 202.54 | Why ?  |
| PLAT172_ALERT_4_G The CIF-Embedded .res File Contains DFIX Records | 7      | Report |
| PLAT173_ALERT_4_G The CIF-Embedded .res File Contains DANG Records | 6      | Report |
| PLAT232_ALERT_2_G Hirshfeld Test Diff (M-X) Dy1A --O1 .            | 7.2    | s.u.   |
| PLAT232_ALERT_2_G Hirshfeld Test Diff (M-X) Dy2A --O2 .            | 5.7    | s.u.   |

|                   |                                                  |                |   |            |
|-------------------|--------------------------------------------------|----------------|---|------------|
| PLAT232_ALERT_2_G | Hirshfeld Test Diff (M-X) Dy2A                   | --03           | . | 11.2 s.u.  |
| PLAT242_ALERT_2_G | Low 'MainMol' Ueq as Compared to Neighbors of    |                |   | C19 Check  |
| PLAT242_ALERT_2_G | Low 'MainMol' Ueq as Compared to Neighbors of    |                |   | C23 Check  |
| PLAT242_ALERT_2_G | Low 'MainMol' Ueq as Compared to Neighbors of    |                |   | C24 Check  |
| PLAT242_ALERT_2_G | Low 'MainMol' Ueq as Compared to Neighbors of    |                |   | C28 Check  |
| PLAT300_ALERT_4_G | Atom Site Occupancy of H18A                      | Constrained at |   | 0.5 Check  |
| PLAT300_ALERT_4_G | Atom Site Occupancy of H18B                      | Constrained at |   | 0.5 Check  |
| PLAT300_ALERT_4_G | Atom Site Occupancy of C50                       | Constrained at |   | 0.5 Check  |
| PLAT300_ALERT_4_G | Atom Site Occupancy of C51                       | Constrained at |   | 0.5 Check  |
| PLAT300_ALERT_4_G | Atom Site Occupancy of C52                       | Constrained at |   | 0.5 Check  |
| PLAT300_ALERT_4_G | Atom Site Occupancy of C53                       | Constrained at |   | 0.5 Check  |
| PLAT300_ALERT_4_G | Atom Site Occupancy of C54                       | Constrained at |   | 0.5 Check  |
| PLAT300_ALERT_4_G | Atom Site Occupancy of H50A                      | Constrained at |   | 0.5 Check  |
| PLAT300_ALERT_4_G | Atom Site Occupancy of H50B                      | Constrained at |   | 0.5 Check  |
| PLAT300_ALERT_4_G | Atom Site Occupancy of H50C                      | Constrained at |   | 0.5 Check  |
| PLAT300_ALERT_4_G | Atom Site Occupancy of H51A                      | Constrained at |   | 0.5 Check  |
| PLAT300_ALERT_4_G | Atom Site Occupancy of H51B                      | Constrained at |   | 0.5 Check  |
| PLAT300_ALERT_4_G | Atom Site Occupancy of H52A                      | Constrained at |   | 0.5 Check  |
| PLAT300_ALERT_4_G | Atom Site Occupancy of H52B                      | Constrained at |   | 0.5 Check  |
| PLAT300_ALERT_4_G | Atom Site Occupancy of H53A                      | Constrained at |   | 0.5 Check  |
| PLAT300_ALERT_4_G | Atom Site Occupancy of H53B                      | Constrained at |   | 0.5 Check  |
| PLAT300_ALERT_4_G | Atom Site Occupancy of H54A                      | Constrained at |   | 0.5 Check  |
| PLAT300_ALERT_4_G | Atom Site Occupancy of H54B                      | Constrained at |   | 0.5 Check  |
| PLAT300_ALERT_4_G | Atom Site Occupancy of C55                       | Constrained at |   | 0.5 Check  |
| PLAT300_ALERT_4_G | Atom Site Occupancy of C56                       | Constrained at |   | 0.5 Check  |
| PLAT300_ALERT_4_G | Atom Site Occupancy of H55A                      | Constrained at |   | 0.5 Check  |
| PLAT300_ALERT_4_G | Atom Site Occupancy of H55B                      | Constrained at |   | 0.5 Check  |
| PLAT300_ALERT_4_G | Atom Site Occupancy of H56A                      | Constrained at |   | 0.5 Check  |
| PLAT300_ALERT_4_G | Atom Site Occupancy of H56B                      | Constrained at |   | 0.5 Check  |
| PLAT300_ALERT_4_G | Atom Site Occupancy of H56C                      | Constrained at |   | 0.5 Check  |
| PLAT301_ALERT_3_G | Main Residue Disorder .....(Resd 1 )             |                |   | 23% Note   |
| PLAT302_ALERT_4_G | Anion/Solvent/Minor-Residue Disorder (Resd 2 )   |                |   | 100% Note  |
| PLAT302_ALERT_4_G | Anion/Solvent/Minor-Residue Disorder (Resd 3 )   |                |   | 100% Note  |
| PLAT380_ALERT_4_G | Incorrectly? Oriented X(sp2)-Methyl Moiety ..... |                |   | C15 Check  |
| PLAT432_ALERT_2_G | Short Inter X...Y Contact F17B ..C51             |                |   | 2.20 Ang.  |
| PLAT432_ALERT_2_G | Short Inter X...Y Contact F17B ..C52             |                |   | 2.92 Ang.  |
| PLAT432_ALERT_2_G | Short Inter X...Y Contact C50 ..C50              |                |   | 0.85 Ang.  |
| PLAT432_ALERT_2_G | Short Inter X...Y Contact C50 ..C51              |                |   | 2.18 Ang.  |
| PLAT432_ALERT_2_G | Short Inter X...Y Contact C53 ..C55              |                |   | 2.62 Ang.  |
| PLAT432_ALERT_2_G | Short Inter X...Y Contact C54 ..C55              |                |   | 1.55 Ang.  |
| PLAT432_ALERT_2_G | Short Inter X...Y Contact C54 ..C56              |                |   | 2.50 Ang.  |
| PLAT779_ALERT_4_G | Suspect or Irrelevant (Bond) Angle in CIF .... # |                |   | 125 Check  |
|                   | 01 -C20 -DY2A 1.555 1.555 1.555                  |                |   | 31.20 Deg. |
| PLAT779_ALERT_4_G | Suspect or Irrelevant (Bond) Angle in CIF .... # |                |   | 132 Check  |
|                   | 02 -C22 -DY2A 1.555 1.555 1.555                  |                |   | 34.00 Deg. |
| PLAT811_ALERT_5_G | No ADDSYM Analysis: Too Many Excluded Atoms .... |                |   | ! Info     |
| PLAT860_ALERT_3_G | Number of Least-Squares Restraints .....         |                |   | 44 Note    |

---

3 **ALERT level A** = Most likely a serious problem - resolve or explain  
 8 **ALERT level B** = A potentially serious problem, consider carefully  
 22 **ALERT level C** = Check. Ensure it is not caused by an omission or oversight  
 53 **ALERT level G** = General information/check it is not something unexpected

1 ALERT type 1 CIF construction/syntax error, inconsistent or missing data  
 36 ALERT type 2 Indicator that the structure model may be wrong or deficient  
 7 ALERT type 3 Indicator that the structure quality may be low  
 40 ALERT type 4 Improvement, methodology, query or suggestion  
 2 ALERT type 5 Informative message, check

---

## Datablock: 2-close

---

Bond precision: C-C = 0.0121 A

Wavelength=0.71073

Cell: a=11.7047(3) b=19.6164(1) c=20.8522(2)  
alpha=71.022(8) beta=79.601(9) gamma=70.806(7)

Temperature: 96 K

|                | Calculated                             | Reported                  |
|----------------|----------------------------------------|---------------------------|
| Volume         | 4261.3(3)                              | 4261.3(3)                 |
| Space group    | P -1                                   | P -1                      |
| Hall group     | -P 1                                   | -P 1                      |
| Moiety formula | C65 H34 Dy2 F36 N4 O12 S2, ?<br>C7 H16 |                           |
| Sum formula    | C72 H50 Dy2 F36 N4 O12 S2              | C72 H50 Dy2 F36 N4 O12 S2 |
| Mr             | 2236.28                                | 2236.28                   |
| Dx,g cm-3      | 1.743                                  | 1.743                     |
| Z              | 2                                      | 2                         |
| Mu (mm-1)      | 1.926                                  | 1.926                     |
| F000           | 2188.0                                 | 2188.0                    |
| F000'          | 2189.48                                |                           |
| h,k,lmax       | 13,22,23                               | 12,22,22                  |
| Nref           | 13593                                  | 10338                     |
| Tmin,Tmax      | 0.955,0.962                            | 0.737,1.000               |
| Tmin'          | 0.680                                  |                           |

Correction method= # Reported T Limits: Tmin=0.737 Tmax=1.000

AbsCorr = MULTI-SCAN

Data completeness= 0.761

Theta(max)= 24.133

R(reflections)= 0.0365( 8283)

wR2(reflections)= 0.0963( 10338)

S = 0.978

Npar= 1191

---

The following ALERTS were generated. Each ALERT has the format

**test-name\_ALERT\_alert-type\_alert-level.**

Click on the hyperlinks for more details of the test.

---

### Alert level A

|                                                                   |            |
|-------------------------------------------------------------------|------------|
| PLAT029_ALERT_3_A _diffn_measured_fraction_theta_full value Low . | 0.760 Why? |
| PLAT213_ALERT_2_A Atom F1 has ADP max/min Ratio .....             | 5.6 prolat |
| PLAT213_ALERT_2_A Atom F3 has ADP max/min Ratio .....             | 5.4 prolat |
| PLAT234_ALERT_4_A Large Hirshfeld Difference C69 -- C70           | 0.37 Ang.  |

---

### Alert level B

|                           |                             |            |
|---------------------------|-----------------------------|------------|
| PLAT213_ALERT_2_B Atom F2 | has ADP max/min Ratio ..... | 5.0 prolat |
|---------------------------|-----------------------------|------------|

|                   |                            |                       |        |      |        |
|-------------------|----------------------------|-----------------------|--------|------|--------|
| PLAT213_ALERT_2_B | Atom F8                    | has ADP max/min Ratio | .....  | 4.1  | prolat |
| PLAT213_ALERT_2_B | Atom F20                   | has ADP max/min Ratio | .....  | 4.7  | prolat |
| PLAT234_ALERT_4_B | Large Hirshfeld Difference | C66                   | -- C67 | 0.30 | Ang.   |
| PLAT360_ALERT_2_B | Short C(sp3)-C(sp3) Bond   | C69                   | - C70  | 1.27 | Ang.   |

### ● Alert level C

ABSTY02\_ALERT\_1\_C An \_exptl\_absorpt\_correction\_type has been given without a literature citation. This should be contained in the \_exptl\_absorpt\_process\_details field.  
Absorption correction given as Multi-scan

REFNR01\_ALERT\_3\_C Ratio of reflections to parameters is < 10 for a centrosymmetric structure

|                                 |        |
|---------------------------------|--------|
| sine(theta)/lambda              | 0.5753 |
| Proportion of unique data used  | 1.0000 |
| Ratio reflections to parameters | 8.6801 |

THETM01\_ALERT\_3\_C The value of sine(theta\_max)/wavelength is less than 0.590  
Calculated sin(theta\_max)/wavelength = 0.5753

PLAT155\_ALERT\_4\_C The Triclinic Unitcell is NOT Reduced ..... Please Do !

|                   |                                                |       |                         |         |          |
|-------------------|------------------------------------------------|-------|-------------------------|---------|----------|
| PLAT220_ALERT_2_C | Non-Solvent Resd 1                             | C     | Ueq(max)/Ueq(min) Range | 3.3     | Ratio    |
| PLAT220_ALERT_2_C | Non-Solvent Resd 1                             | F     | Ueq(max)/Ueq(min) Range | 5.9     | Ratio    |
| PLAT230_ALERT_2_C | Hirshfeld Test Diff for                        | O1    | --C37                   | ..      | 5.5 s.u. |
| PLAT231_ALERT_4_C | Hirshfeld Test (Solvent)                       | C68   | --C69                   | ..      | 7.3 s.u. |
| PLAT231_ALERT_4_C | Hirshfeld Test (Solvent)                       | C71   | --C72                   | ..      | 8.4 s.u. |
| PLAT234_ALERT_4_C | Large Hirshfeld Difference                     | F2    | -- C36                  | 0.19    | Ang.     |
| PLAT234_ALERT_4_C | Large Hirshfeld Difference                     | F20   | -- C51                  | 0.19    | Ang.     |
| PLAT234_ALERT_4_C | Large Hirshfeld Difference                     | F21   | -- C51                  | 0.18    | Ang.     |
| PLAT243_ALERT_4_C | High 'Solvent' Ueq as Compared to Neighbors of |       |                         | C68     | Check    |
| PLAT243_ALERT_4_C | High 'Solvent' Ueq as Compared to Neighbors of |       |                         | C70     | Check    |
| PLAT244_ALERT_4_C | Low 'Solvent' Ueq as Compared to Neighbors of  |       |                         | C67     | Check    |
| PLAT244_ALERT_4_C | Low 'Solvent' Ueq as Compared to Neighbors of  |       |                         | C69     | Check    |
| PLAT244_ALERT_4_C | Low 'Solvent' Ueq as Compared to Neighbors of  |       |                         | C71     | Check    |
| PLAT250_ALERT_2_C | Large U3/U1 Ratio for Average U(i,j) Tensor    | ....  |                         | 3.3     | Note     |
| PLAT342_ALERT_3_C | Low Bond Precision on C-C Bonds                | ..... |                         | 0.01213 | Ang.     |
| PLAT360_ALERT_2_C | Short C(sp3)-C(sp3) Bond                       | C67   | - C68                   | 1.38    | Ang.     |
| PLAT360_ALERT_2_C | Short C(sp3)-C(sp3) Bond                       | C68   | - C69                   | 1.41    | Ang.     |
| PLAT360_ALERT_2_C | Short C(sp3)-C(sp3) Bond                       | C70   | - C71                   | 1.34    | Ang.     |
| PLAT410_ALERT_2_C | Short Intra H...H Contact                      | H44   | ..H46                   | 1.96    | Ang.     |
| PLAT410_ALERT_2_C | Short Intra H...H Contact                      | H45   | ..H47                   | 1.96    | Ang.     |

### ● Alert level G

|                   |                                               |           |         |           |
|-------------------|-----------------------------------------------|-----------|---------|-----------|
| PLAT242_ALERT_2_G | Low 'MainMol' Ueq as Compared to Neighbors of | C36       | Check   |           |
| PLAT242_ALERT_2_G | Low 'MainMol' Ueq as Compared to Neighbors of | C40       | Check   |           |
| PLAT242_ALERT_2_G | Low 'MainMol' Ueq as Compared to Neighbors of | C41       | Check   |           |
| PLAT242_ALERT_2_G | Low 'MainMol' Ueq as Compared to Neighbors of | C45       | Check   |           |
| PLAT242_ALERT_2_G | Low 'MainMol' Ueq as Compared to Neighbors of | C46       | Check   |           |
| PLAT242_ALERT_2_G | Low 'MainMol' Ueq as Compared to Neighbors of | C50       | Check   |           |
| PLAT242_ALERT_2_G | Low 'MainMol' Ueq as Compared to Neighbors of | C51       | Check   |           |
| PLAT242_ALERT_2_G | Low 'MainMol' Ueq as Compared to Neighbors of | C55       | Check   |           |
| PLAT242_ALERT_2_G | Low 'MainMol' Ueq as Compared to Neighbors of | C56       | Check   |           |
| PLAT242_ALERT_2_G | Low 'MainMol' Ueq as Compared to Neighbors of | C60       | Check   |           |
| PLAT242_ALERT_2_G | Low 'MainMol' Ueq as Compared to Neighbors of | C61       | Check   |           |
| PLAT242_ALERT_2_G | Low 'MainMol' Ueq as Compared to Neighbors of | C65       | Check   |           |
| PLAT301_ALERT_3_G | Main Residue Disorder .....                   | (Resd 1 ) | 3% Note |           |
| PLAT344_ALERT_2_G | Unusual sp3 Angle Range in Solvent/Ion for    | C67       | Check   |           |
| PLAT344_ALERT_2_G | Unusual sp3 Angle Range in Solvent/Ion for    | C68       | Check   |           |
| PLAT344_ALERT_2_G | Unusual sp3 Angle Range in Solvent/Ion for    | C71       | Check   |           |
| PLAT434_ALERT_2_G | Short Inter HL..HL Contact                    | F5        | ..F30   | 2.80 Ang. |
| PLAT434_ALERT_2_G | Short Inter HL..HL Contact                    | F9        | ..F32   | 2.84 Ang. |
| PLAT434_ALERT_2_G | Short Inter HL..HL Contact                    | F13       | ..F36   | 2.68 Ang. |

|                                               |               |          |
|-----------------------------------------------|---------------|----------|
| PLAT793_ALERT_4_G Model has Chirality at C14A | (Centro SPGR) | S Verify |
| PLAT793_ALERT_4_G Model has Chirality at C22A | (Centro SPGR) | S Verify |
| PLAT793_ALERT_4_G Model has Chirality at C14B | (Centro SPGR) | R Verify |
| PLAT793_ALERT_4_G Model has Chirality at C22B | (Centro SPGR) | R Verify |

---

4 **ALERT level A** = Most likely a serious problem - resolve or explain  
 5 **ALERT level B** = A potentially serious problem, consider carefully  
 24 **ALERT level C** = Check. Ensure it is not caused by an omission or oversight  
 23 **ALERT level G** = General information/check it is not something unexpected

1 ALERT type 1 CIF construction/syntax error, inconsistent or missing data  
 33 ALERT type 2 Indicator that the structure model may be wrong or deficient  
 5 ALERT type 3 Indicator that the structure quality may be low  
 17 ALERT type 4 Improvement, methodology, query or suggestion  
 0 ALERT type 5 Informative message, check

---

It is advisable to attempt to resolve as many as possible of the alerts in all categories. Often the minor alerts point to easily fixed oversights, errors and omissions in your CIF or refinement strategy, so attention to these fine details can be worthwhile. In order to resolve some of the more serious problems it may be necessary to carry out additional measurements or structure refinements. However, the purpose of your study may justify the reported deviations and the more serious of these should normally be commented upon in the discussion or experimental section of a paper or in the "special\_details" fields of the CIF. checkCIF was carefully designed to identify outliers and unusual parameters, but every test has its limitations and alerts that are not important in a particular case may appear. Conversely, the absence of alerts does not guarantee there are no aspects of the results needing attention. It is up to the individual to critically assess their own results and, if necessary, seek expert advice.

### Publication of your CIF in IUCr journals

A basic structural check has been run on your CIF. These basic checks will be run on all CIFs submitted for publication in IUCr journals (*Acta Crystallographica*, *Journal of Applied Crystallography*, *Journal of Synchrotron Radiation*); however, if you intend to submit to *Acta Crystallographica Section C* or *E* or *IUCrData*, you should make sure that full publication checks are run on the final version of your CIF prior to submission.

### Publication of your CIF in other journals

Please refer to the *Notes for Authors* of the relevant journal for any special instructions relating to CIF submission.

---

**PLATON version of 09/11/2017; check.def file version of 08/11/2017**

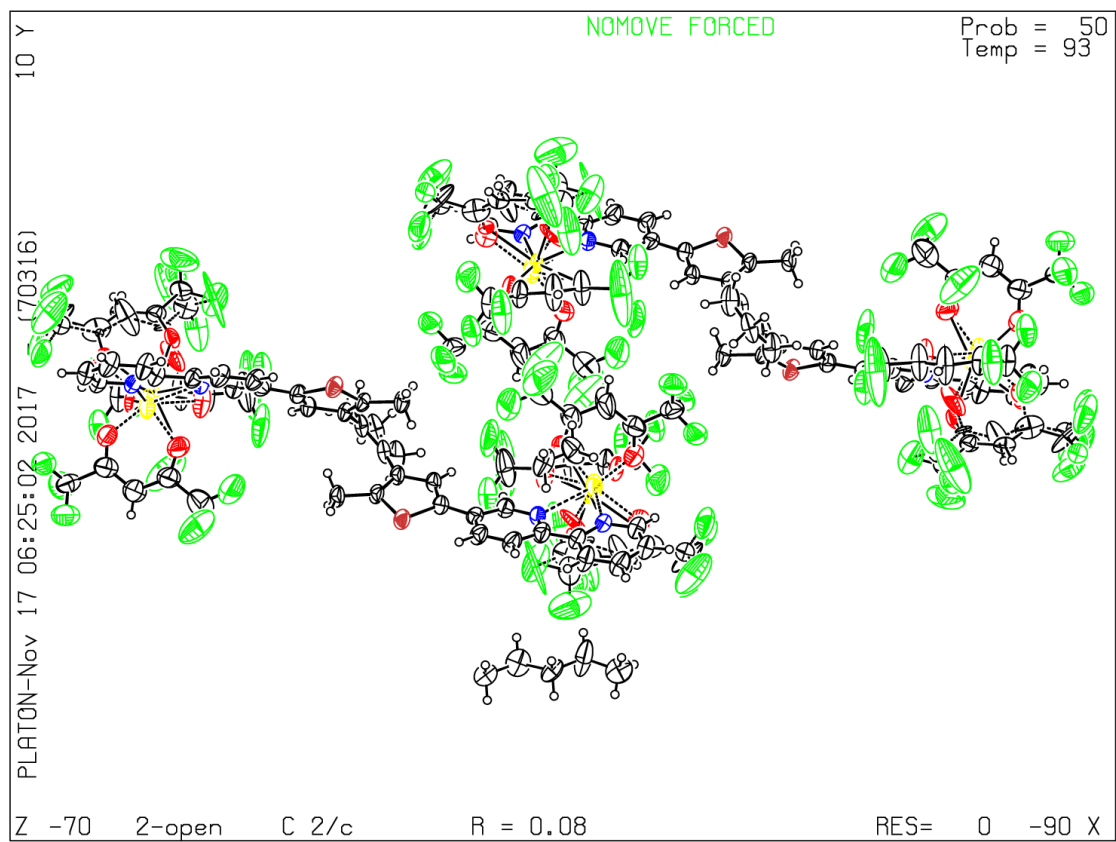

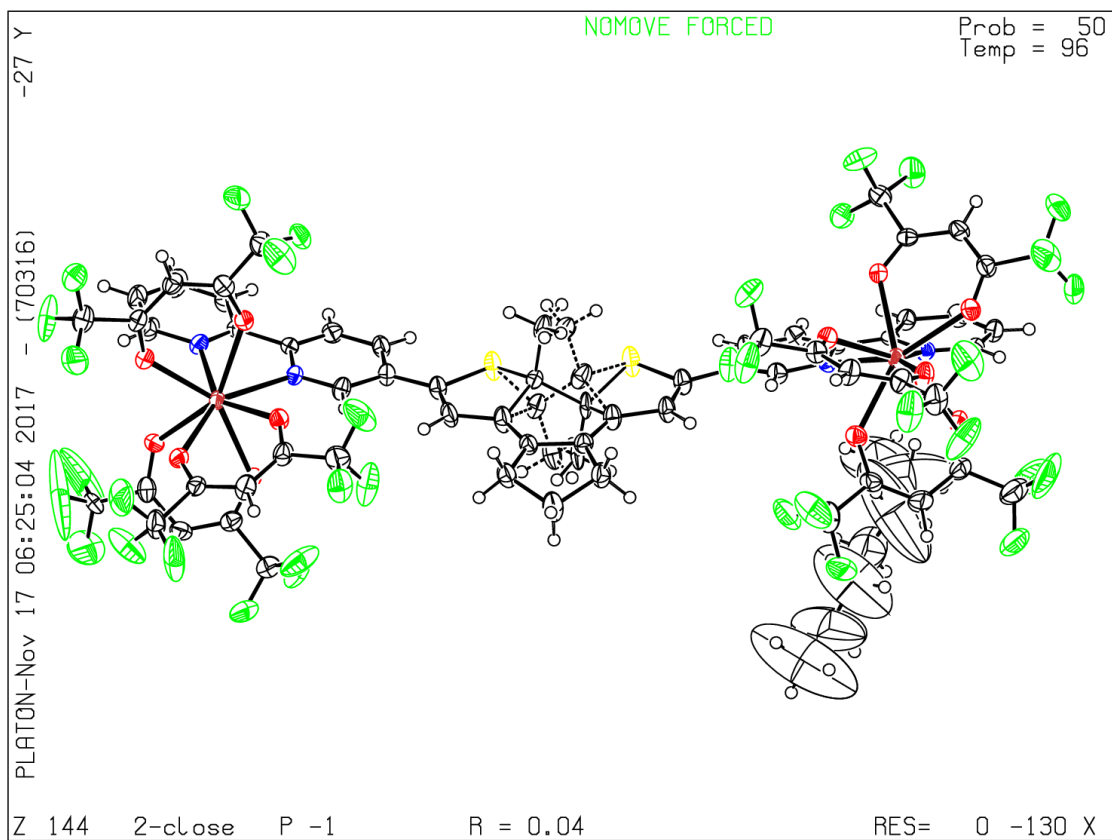

Supplement: s1 [file s1]
