# Supplementary material
Source: MDPI journal article supplement (https://www.mdpi.com/2304-6740/6/1/9)
Supplement: s1 [file s1]

# Photo-modulation of Single-Molecule Magnetic Dynamics of a Dysprosium Dinuclear Complex via a Diarylethene Bridge

Goulven Cosquer,<sup>\*a,b</sup> Mritunjoy Kamila,<sup>a</sup> Brian K. Breedlove,<sup>a</sup> and Masahiro Yamashita<sup>\*a,b,c,d</sup>

<sup>a</sup> Department of Chemistry, Graduate School of Science, Tohoku University, 6-3 Aramaki-Aza-Aoba, Sendai 980-8578 (Japan)

<sup>b</sup> CREST, JST, 4-1-8 Honcho, Kawaguchi, Saitama 332-0012 (Japan)

<sup>c</sup> WPI Research Center, Advanced Institute for Materials Research, Tohoku University, 2-1-1 Katahira, Aoba-ku, Sendai 980-8577 (Japan)

<sup>d</sup> School of Materials Science and Engineering, Nankai University, Tianjin 300350, China

## SUPPORTING INFORMATION

|                                                                              | <b>2<sub>open</sub></b>                                                                                       | <b>2<sub>close</sub></b>                                                                                      |
|------------------------------------------------------------------------------|---------------------------------------------------------------------------------------------------------------|---------------------------------------------------------------------------------------------------------------|
| Formula                                                                      | C <sub>72</sub> H <sub>50</sub> Dy <sub>2</sub> F <sub>36</sub> N <sub>4</sub> O <sub>12</sub> S <sub>2</sub> | C <sub>72</sub> H <sub>50</sub> Dy <sub>2</sub> F <sub>36</sub> N <sub>4</sub> O <sub>12</sub> S <sub>2</sub> |
| Molecular weight (g mol <sup>-1</sup> )                                      | 2236.26                                                                                                       | 2236.26                                                                                                       |
| Crystal system                                                               | monoclinic                                                                                                    | triclinic                                                                                                     |
| Space group                                                                  | C2/c                                                                                                          | P1                                                                                                            |
| <i>a</i> Å                                                                   | 28.340 (4)                                                                                                    | 11.7047 (3)                                                                                                   |
| <i>b</i> Å                                                                   | 12.5017 (16)                                                                                                  | 19.6164 (1)                                                                                                   |
| <i>c</i> Å                                                                   | 26.031 (3)                                                                                                    | 20.8522 (2)                                                                                                   |
| $\alpha$ °                                                                   | 90                                                                                                            | 71.022 (8)                                                                                                    |
| $\beta$ °                                                                    | 112.042 (1)                                                                                                   | 79.601 (9)                                                                                                    |
| $\gamma$ °                                                                   | 90                                                                                                            | 70.806 (7)                                                                                                    |
| <i>V</i> Å <sup>3</sup>                                                      | 8548.7 (18)                                                                                                   | 4261.3 (3)                                                                                                    |
| <i>Z</i>                                                                     | 4                                                                                                             | 2                                                                                                             |
| <i>R</i> <sub>int</sub> , <i>R</i> <sub>1</sub> , <i>wR</i> <sub>2</sub> (%) | 2.63, 7.84, 20.07                                                                                             | 2.30, 3.65, 9.28                                                                                              |

**Table S1:** Summary of the crystal parameters for **2<sub>open</sub>** and **2<sub>close</sub>**.

|                       |                                 | <b>2<sub>open</sub></b> |                  | <b>2<sub>close</sub></b> |       |
|-----------------------|---------------------------------|-------------------------|------------------|--------------------------|-------|
|                       |                                 | Dy1 <sub>A</sub>        | Dy1 <sub>B</sub> | Dy1                      | Dy2   |
| <i>D<sub>4d</sub></i> | Square anti-prism               | 2.007                   | 3.252            | 0.495                    | 0.404 |
| <i>C<sub>2v</sub></i> | Bi-augmented trigonal prism     | 2.493                   | 4.012            | 2.466                    | 2.304 |
| <i>C<sub>2v</sub></i> | Bi-augmented trigonal prism J50 | 3.236                   | 4.528            | 2.974                    | 2.880 |
| <i>D<sub>2d</sub></i> | Triangular dodecahedron         | 0.849                   | 2.634            | 2.417                    | 2.543 |

**Table S2:** deviation from the idealized coordination geometries obtained by using SHAPE

2.1. Lowest value is better.

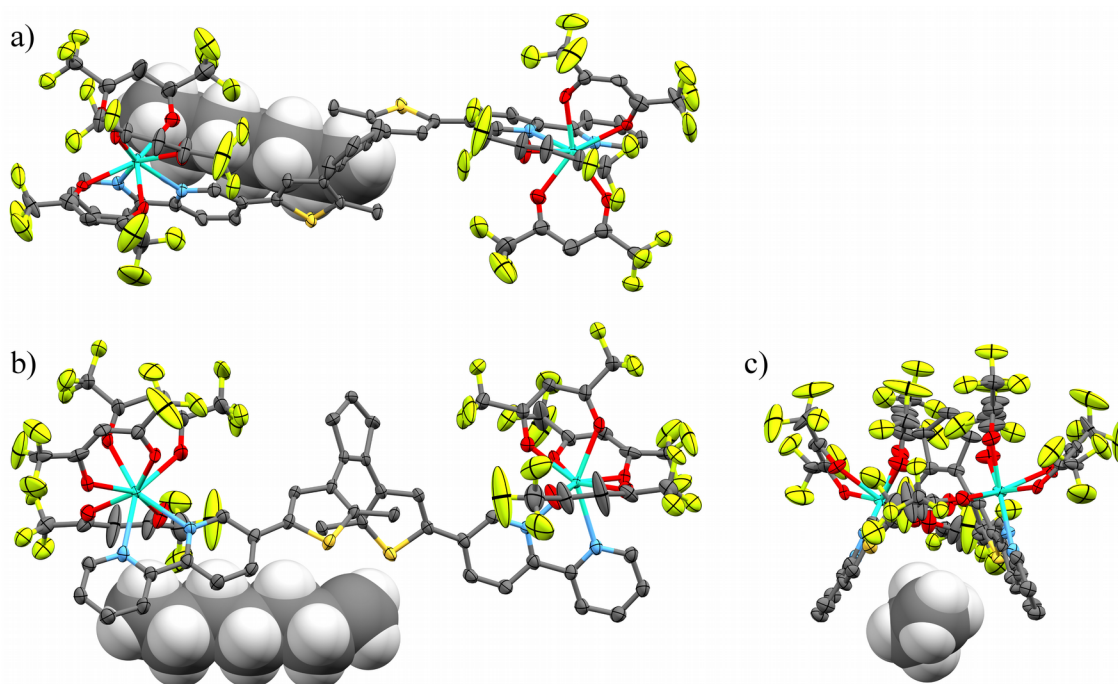

**Figure S1:** (a) top, (b) front and (c) side views of the interactions between the DTE ligand and the heptane solvent molecule in **2<sub>open</sub>**.

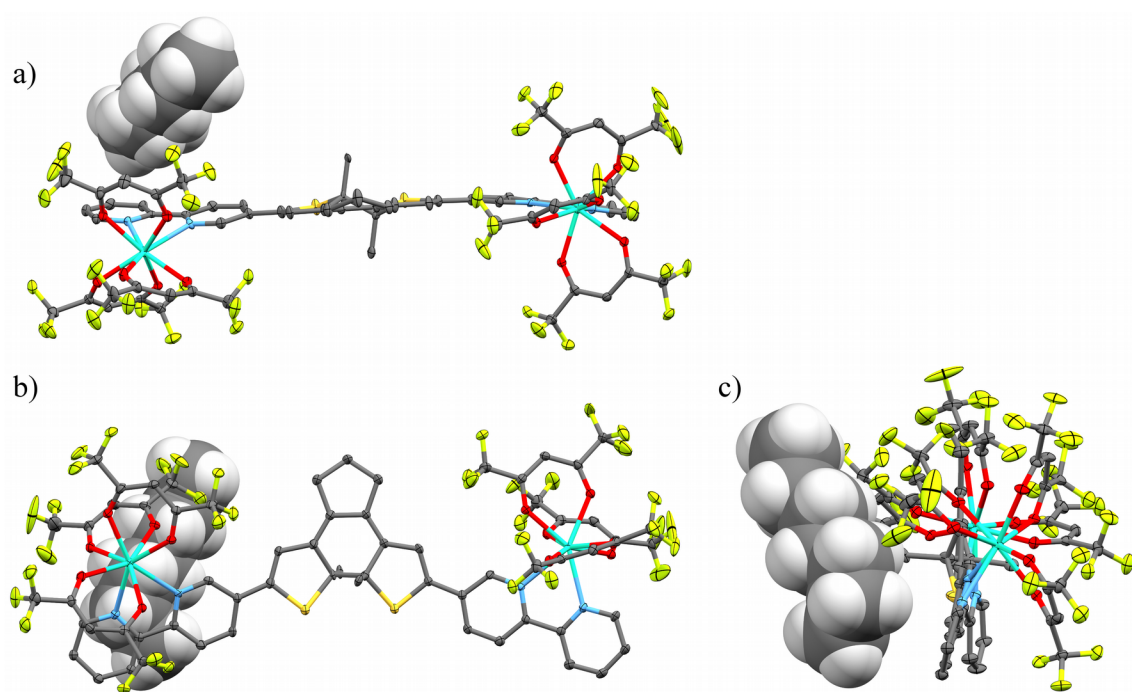

**Figure S2:** (a) top, (b) front and (c) side views of the interactions between the DTE ligand and the heptane solvent molecule in  $2_{\text{close}}$ .

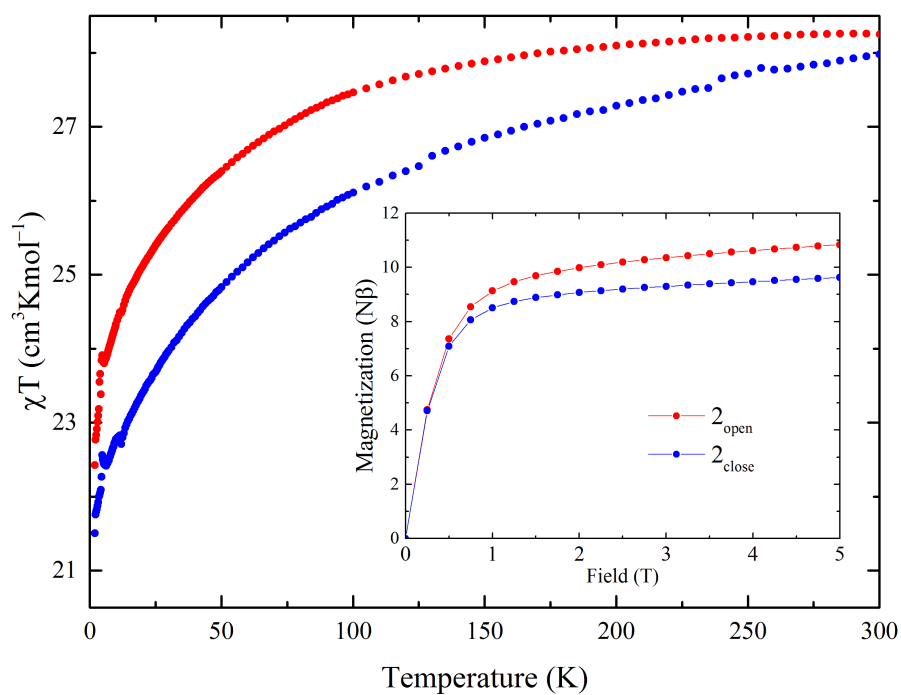

**Figure S3:**  $T$  dependence of  $\chi T$  for  $2_{\text{open}}$  and  $2_{\text{close}}$  and the field dependence of the magnetization at 1.82 K in inset.

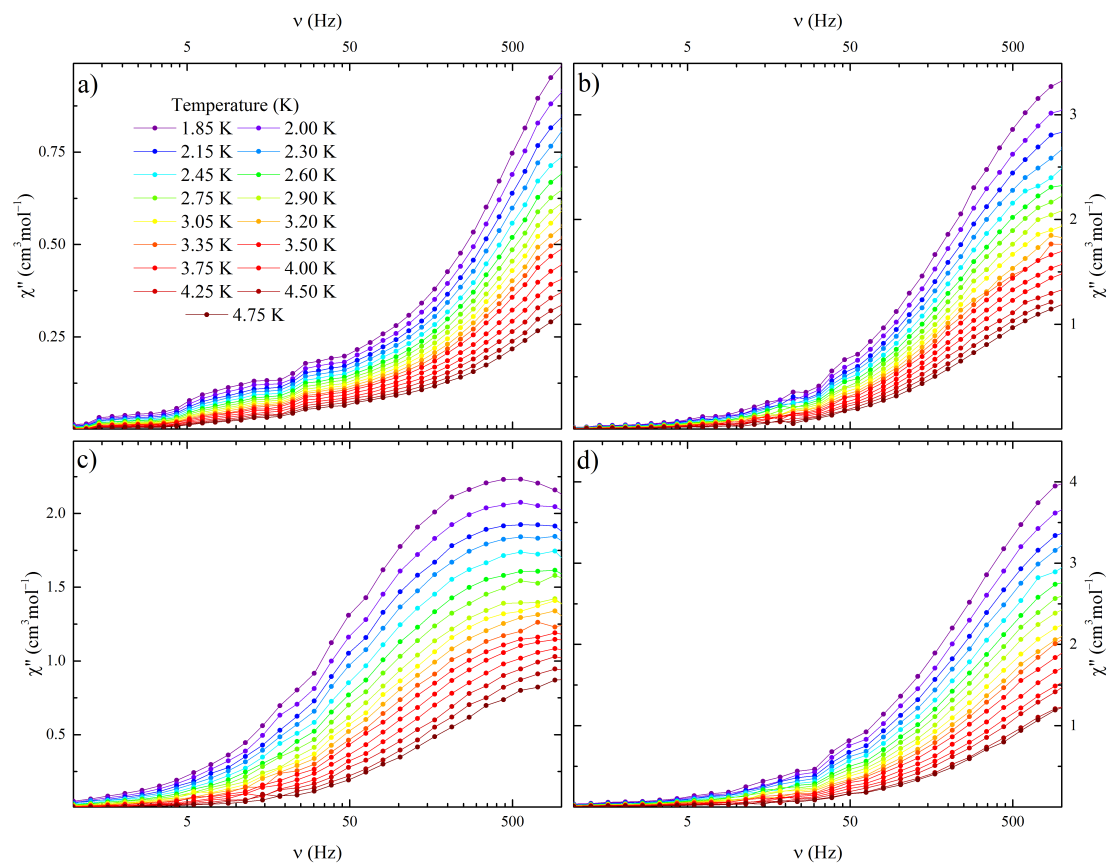

**Figure S4:**  $T$  and  $\nu$  dependences of  $\chi''$  in (a and b) the solid state and (c and d) solution state, for  $\mathbf{2}_{\text{open}}$  and  $\mathbf{2}_{\text{close}}$ , respectively, in a 0 Oe magnetic field.

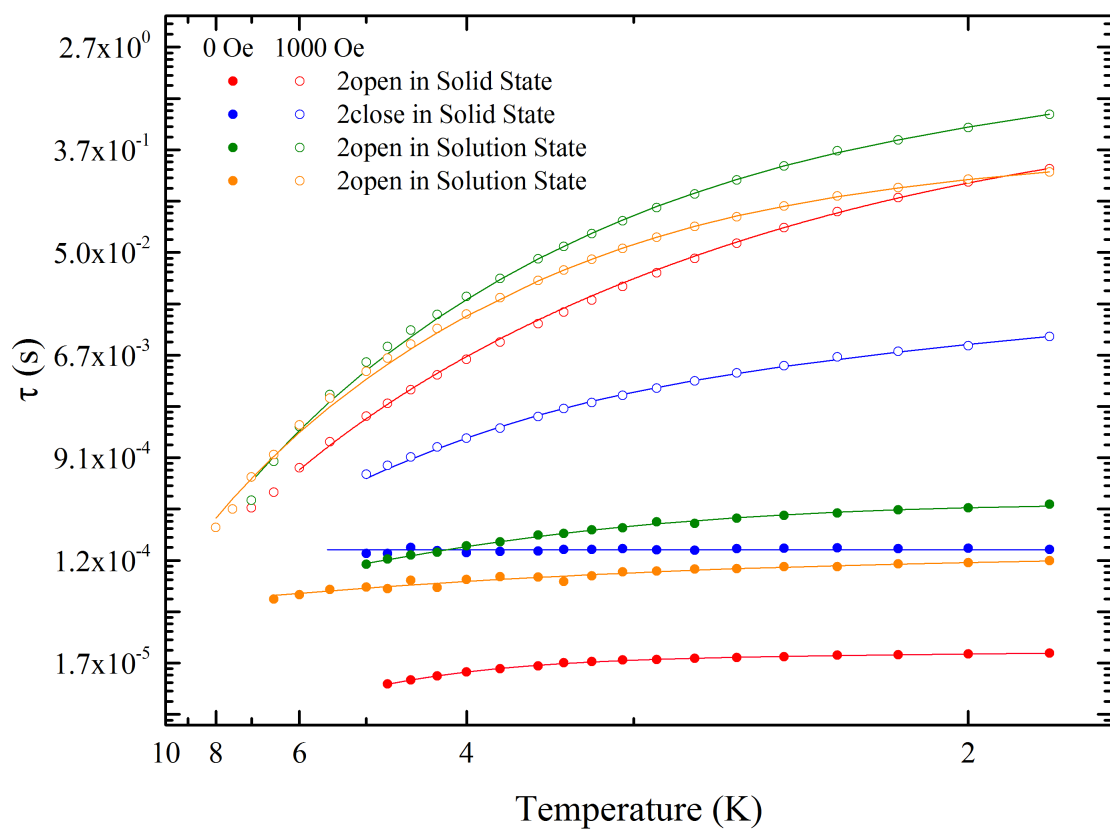

**Figure S5:** Arrhenius plots with best-fit curves (lines).

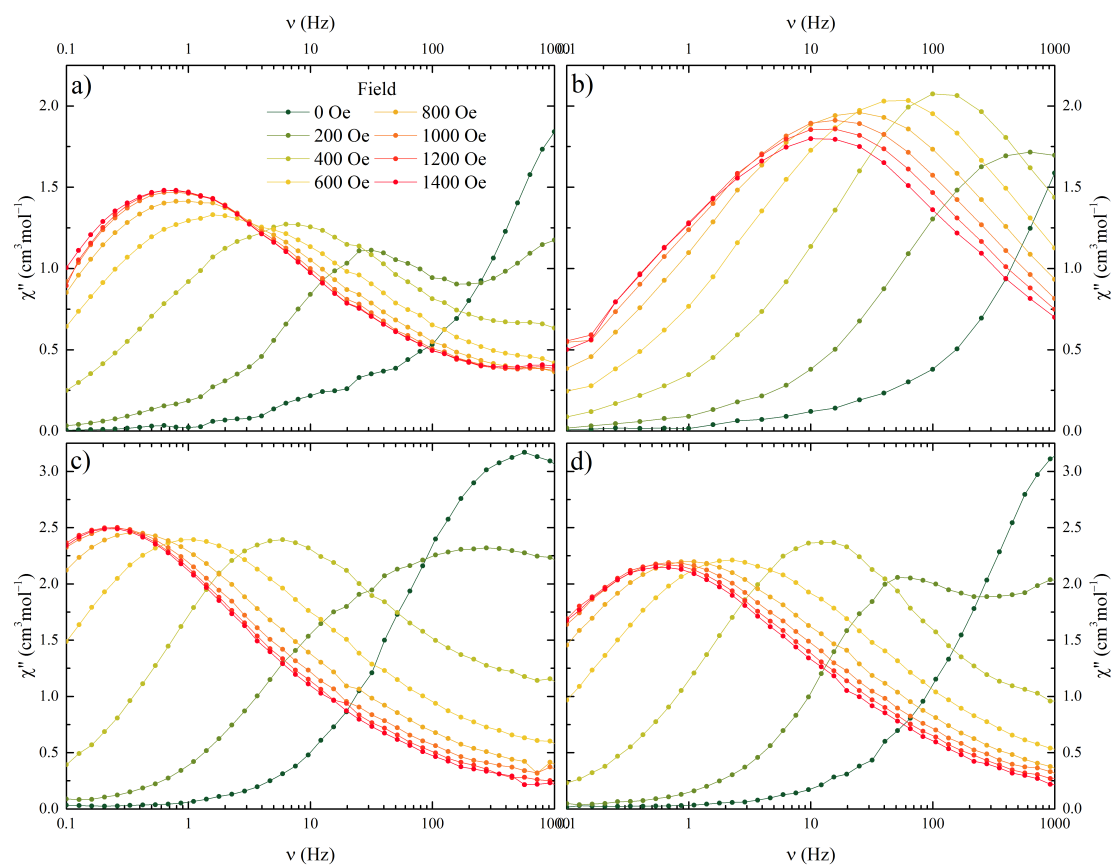

**Figure S6:**  $H$  and  $\nu$  dependences of  $\chi''$  in (a and b) the solid state and (c and d) solution state for  $2_{\text{open}}$  and  $2_{\text{close}}$ , respectively, at 1.85 K.

| Process        |             | Direct                              |                        |      |   | Raman                 |                       |      | Orbach              |                    |                                              |                                              | QTM                   |                       | Statistics             |         |
|----------------|-------------|-------------------------------------|------------------------|------|---|-----------------------|-----------------------|------|---------------------|--------------------|----------------------------------------------|----------------------------------------------|-----------------------|-----------------------|------------------------|---------|
| Parameter      |             | A                                   |                        | H    | n | C                     |                       | m    | $\Delta$            |                    | $\tau_0$                                     |                                              | QTM                   |                       | Chisqr                 | RR      |
| Unit           |             | $s^{-1} \cdot K^{-n} \cdot Oe^{-4}$ |                        | Oe   |   | $s^{-1} \cdot K^{-m}$ |                       |      | $cm^{-1}$           |                    | s                                            |                                              | $s^{-1}$              |                       |                        |         |
|                |             | Value                               | Standard Error         |      |   | Value                 | Standard Error        |      | Value               | Standard Error     | Value                                        | Standard Error                               | Value                 | Standard Error        |                        |         |
| Solid State    | $2_{open}$  |                                     |                        | 0    |   |                       |                       |      | 19.08107<br>0.36954 | 1.27119<br>0.07024 | $5.2 \times 10^{-7}$<br>$1.7 \times 10^{-5}$ | $1.3 \times 10^{-7}$<br>$5.7 \times 10^{-7}$ |                       |                       | $1.86 \times 10^{-14}$ | 0.99773 |
|                |             | $9.5 \times 10^{-13}$               | $2.5 \times 10^{-14}$  | 1000 | 1 | 0.07267               | 0.00112               | 5.5  |                     |                    |                                              |                                              |                       |                       | $2.59 \times 10^{-6}$  | 0.9995  |
|                | $2_{close}$ |                                     |                        | 0    |   |                       |                       |      | 28.25               | 3.27               | $1.02 \times 10^{-6}$                        | $5.64 \times 10^{-7}$                        | $1.51 \times 10^{-4}$ | $2.79 \times 10^{-6}$ | $8.37 \times 10^{-7}$  | 0.95802 |
|                |             | $2.99 \times 10^{-11}$              | $2.70 \times 10^{-13}$ | 1000 | 2 |                       |                       |      | 16.72               | 1.40               | $9.14 \times 10^{-6}$                        | $4.96 \times 10^{-6}$                        |                       |                       | $1.48 \times 10^{-8}$  | 0.99802 |
| Solution State | $2_{open}$  |                                     |                        | 0    |   |                       |                       |      | 7.16                | 0.30               | $2.1 \times 10^{-5}$                         | $2.0 \times 10^{-6}$                         | $3.79 \times 10^{-4}$ | $8.95 \times 10^{-6}$ | $4.0 \times 10^{-2}$   | 0.99574 |
|                |             | $3.10 \times 10^{-13}$              | $2.87 \times 10^{-15}$ | 1000 | 2 | $5.5 \times 10^{-5}$  | $1.02 \times 10^{-4}$ | 6.5  |                     |                    |                                              |                                              |                       |                       | $1.49 \times 10^{-5}$  | 0.99965 |
|                | $2_{close}$ |                                     |                        | 0    |   |                       |                       |      | 4.48                | 0.73               | $4.20 \times 10^{-5}$                        | $6.80 \times 10^{-6}$                        | $1.33 \times 10^{-4}$ | $8.53 \times 10^{-6}$ | $1.84 \times 10^{-7}$  | 0.95451 |
|                |             | $1.89 \times 10^{-12}$              | $1.53 \times 10^{-14}$ | 1000 | 1 | $1.9 \times 10^{-2}$  | $1.29 \times 10^{-3}$ | 5.85 |                     |                    |                                              |                                              |                       |                       | $4.81 \times 10^{-7}$  | 0.99991 |

**Table S3:** Summary of the fitting parameters for the complete model.

| Temperature |      | $\chi_{\text{iso}}$                 |                | $\alpha$ |                                     | $\tau$                |                       | Chisqr                | RR      |
|-------------|------|-------------------------------------|----------------|----------|-------------------------------------|-----------------------|-----------------------|-----------------------|---------|
| K           |      | $\text{cm}^3 \cdot \text{mol}^{-1}$ |                |          |                                     | s                     |                       |                       |         |
|             |      | Value                               | Standard Error | Value    | Standard Error ( $\times 10^{-3}$ ) | Value                 | Standard Error        |                       |         |
| 0 Oe        | 1.85 | 6.01                                | 0.01           | 0.40     | 6.79                                | $2.02 \times 10^{-5}$ | $5.74 \times 10^{-7}$ | $1.17 \times 10^{-3}$ | 0.99984 |
|             | 2.00 | 5.59                                | 0.01           | 0.40     | 6.41                                | $2.00 \times 10^{-5}$ | $5.37 \times 10^{-7}$ | $8.87 \times 10^{-4}$ | 0.99986 |
|             | 2.15 | 5.23                                | 0.01           | 0.40     | 6.23                                | $1.96 \times 10^{-5}$ | $5.19 \times 10^{-7}$ | $7.30 \times 10^{-4}$ | 0.99987 |
|             | 2.30 | 4.93                                | 0.01           | 0.40     | 6.29                                | $1.95 \times 10^{-5}$ | $5.21 \times 10^{-7}$ | $6.56 \times 10^{-4}$ | 0.99987 |
|             | 2.45 | 4.62                                | 0.01           | 0.41     | 6.13                                | $1.89 \times 10^{-5}$ | $4.98 \times 10^{-7}$ | $5.36 \times 10^{-4}$ | 0.99988 |
|             | 2.60 | 4.35                                | 0.01           | 0.41     | 6.04                                | $1.86 \times 10^{-5}$ | $4.82 \times 10^{-7}$ | $4.51 \times 10^{-4}$ | 0.99989 |
|             | 2.75 | 4.13                                | 0.01           | 0.40     | 5.82                                | $1.83 \times 10^{-5}$ | $4.58 \times 10^{-7}$ | $3.69 \times 10^{-4}$ | 0.99990 |
|             | 2.90 | 3.92                                | 0.01           | 0.40     | 5.76                                | $1.79 \times 10^{-5}$ | $4.47 \times 10^{-7}$ | $3.20 \times 10^{-4}$ | 0.99990 |
|             | 3.05 | 3.73                                | 0.01           | 0.40     | 5.70                                | $1.77 \times 10^{-5}$ | $4.34 \times 10^{-7}$ | $2.76 \times 10^{-4}$ | 0.99991 |
|             | 3.20 | 3.57                                | 0.01           | 0.40     | 5.73                                | $1.72 \times 10^{-5}$ | $4.30 \times 10^{-7}$ | $2.52 \times 10^{-4}$ | 0.99991 |
|             | 3.35 | 3.42                                | 0.01           | 0.40     | 5.58                                | $1.67 \times 10^{-5}$ | $4.10 \times 10^{-7}$ | $2.12 \times 10^{-4}$ | 0.99991 |
|             | 3.50 | 3.28                                | 0.01           | 0.40     | 4.90                                | $1.58 \times 10^{-5}$ | $3.46 \times 10^{-7}$ | $1.44 \times 10^{-4}$ | 0.99994 |
|             | 3.75 | 3.07                                | 0.01           | 0.41     | 5.72                                | $1.50 \times 10^{-5}$ | $3.91 \times 10^{-7}$ | $1.65 \times 10^{-4}$ | 0.99992 |
|             | 4.00 | 2.88                                | 0.01           | 0.40     | 5.41                                | $1.40 \times 10^{-5}$ | $3.53 \times 10^{-7}$ | $1.22 \times 10^{-4}$ | 0.99993 |
|             | 4.25 | 2.72                                | 0.01           | 0.40     | 4.72                                | $1.29 \times 10^{-5}$ | $2.89 \times 10^{-7}$ | $7.59 \times 10^{-5}$ | 0.99995 |
|             | 4.50 | 2.57                                | 0.01           | 0.41     | 6.09                                | $1.20 \times 10^{-5}$ | $3.57 \times 10^{-7}$ | $1.07 \times 10^{-4}$ | 0.99992 |
|             | 4.75 | 2.44                                | 0.01           | 0.40     | 4.65                                | $1.11 \times 10^{-5}$ | $2.54 \times 10^{-7}$ | $5.08 \times 10^{-5}$ | 0.99996 |

**Table S4:** Fitting parameters for the Cole-Cole model for the frequency dependence of  $\chi$  of  $\mathbf{2}_{\text{open}}$  in the solid state in a 0 Oe field.  $\chi_{\text{adia}}$  was fixed at 0

| Temperature |      | $\chi_{\text{iso}}$                 |                | $\alpha$                   |                                     | $\tau$                |                       | $\chi_{\text{iso}}$                 |                | $\alpha$ |                | $\tau$                |                       | Chisqr                | RR      |
|-------------|------|-------------------------------------|----------------|----------------------------|-------------------------------------|-----------------------|-----------------------|-------------------------------------|----------------|----------|----------------|-----------------------|-----------------------|-----------------------|---------|
| K           |      | $\text{cm}^3 \cdot \text{mol}^{-1}$ |                |                            |                                     | s                     |                       | $\text{cm}^3 \cdot \text{mol}^{-1}$ |                |          |                | s                     |                       |                       |         |
|             |      | Value                               | Standard Error | Value ( $\times 10^{-1}$ ) | Standard Error ( $\times 10^{-3}$ ) | Value                 | Standard Error        | Value                               | Standard Error | Value    | Standard Error | Value                 | Standard Error        |                       |         |
| 1000 Oe     | 1.85 | 7.29                                | 0.13           | 4.97                       | 5.79                                | $2.53 \times 10^{-1}$ | $4.25 \times 10^{-3}$ | 5.00                                | 0.10           | 0.69     | 0.03           | $4.96 \times 10^{-7}$ | $1.15 \times 10^{-7}$ | $3.74 \times 10^{-4}$ | 0.99996 |
|             | 2.00 | 6.77                                | 0.13           | 4.86                       | 6.15                                | $1.96 \times 10^{-1}$ | $3.44 \times 10^{-3}$ | 4.67                                | 0.10           | 0.69     | 0.03           | $4.06 \times 10^{-7}$ | $1.30 \times 10^{-7}$ | $4.37 \times 10^{-4}$ | 0.99995 |
|             | 2.15 | 6.17                                | 0.13           | 4.72                       | 6.08                                | $1.45 \times 10^{-1}$ | $2.38 \times 10^{-3}$ | 4.48                                | 0.12           | 0.72     | 0.04           | $2.33 \times 10^{-7}$ | $9.15 \times 10^{-8}$ | $3.64 \times 10^{-4}$ | 0.99996 |
|             | 2.30 | 5.73                                | 0.13           | 4.59                       | 6.45                                | $1.10 \times 10^{-1}$ | $1.89 \times 10^{-3}$ | 4.29                                | 0.13           | 0.72     | 0.04           | $1.98 \times 10^{-7}$ | $9.31 \times 10^{-8}$ | $3.79 \times 10^{-4}$ | 0.99995 |
|             | 2.45 | 5.26                                | 0.16           | 4.45                       | 7.30                                | $8.05 \times 10^{-2}$ | $1.39 \times 10^{-3}$ | 4.13                                | 0.17           | 0.74     | 0.05           | $1.21 \times 10^{-7}$ | $7.27 \times 10^{-8}$ | $3.57 \times 10^{-4}$ | 0.99995 |
|             | 2.60 | 4.96                                | 0.17           | 4.40                       | 8.41                                | $5.96 \times 10^{-2}$ | $1.28 \times 10^{-3}$ | 3.89                                | 0.19           | 0.73     | 0.07           | $1.15 \times 10^{-7}$ | $9.68 \times 10^{-8}$ | $4.50 \times 10^{-4}$ | 0.99994 |
|             | 2.75 | 4.64                                | 0.06           | 4.27                       | 4.43                                | $4.44 \times 10^{-2}$ | $5.42 \times 10^{-4}$ | 3.72                                | 0.06           | 0.72     | 0.01           | $1.10 \times 10^{-7}$ | 0                     | $2.62 \times 10^{-4}$ | 0.99996 |
|             | 2.90 | 4.39                                | 0.05           | 4.20                       | 3.90                                | $3.34 \times 10^{-2}$ | $3.79 \times 10^{-4}$ | 3.53                                | 0.05           | 0.71     | 0.01           | $1.10 \times 10^{-7}$ | 0                     | $2.06 \times 10^{-4}$ | 0.99997 |
|             | 3.05 | 4.16                                | 0.05           | 4.11                       | 4.12                                | $2.56 \times 10^{-2}$ | $3.14 \times 10^{-4}$ | 3.38                                | 0.05           | 0.70     | 0.01           | $1.10 \times 10^{-7}$ | 0                     | $2.16 \times 10^{-4}$ | 0.99996 |
|             | 3.20 | 4.06                                | 0.04           | 4.10                       | 3.29                                | $1.97 \times 10^{-2}$ | $2.06 \times 10^{-4}$ | 3.18                                | 0.03           | 0.67     | 0.01           | $1.10 \times 10^{-7}$ | 0                     | $1.34 \times 10^{-4}$ | 0.99998 |
|             | 3.35 | 3.74                                | 0.056          | 3.95                       | 4.26                                | $1.56 \times 10^{-2}$ | $2.01 \times 10^{-4}$ | 3.14                                | 0.05           | 0.69     | 0.02           | $1.10 \times 10^{-7}$ | 0                     | $1.84 \times 10^{-4}$ | 0.99997 |
|             | 3.50 | 3.56                                | 0.05           | 3.88                       | 4.52                                | $1.24 \times 10^{-2}$ | $1.70 \times 10^{-4}$ | 3.03                                | 0.05           | 0.69     | 0.02           | $1.10 \times 10^{-7}$ | 0                     | $1.83 \times 10^{-4}$ | 0.99997 |
|             | 3.75 | 3.28                                | 0.05           | 3.76                       | 5.01                                | $8.67 \times 10^{-3}$ | $1.28 \times 10^{-4}$ | 2.88                                | 0.06           | 0.68     | 0.02           | $1.10 \times 10^{-7}$ | 0                     | $1.68 \times 10^{-4}$ | 0.99997 |
|             | 4.00 | 3.04                                | 0.06           | 3.66                       | 5.69                                | $6.22 \times 10^{-3}$ | $1.03 \times 10^{-4}$ | 2.74                                | 0.06           | 0.68     | 0.03           | $1.10 \times 10^{-7}$ | 0                     | $1.62 \times 10^{-4}$ | 0.99996 |
|             | 4.25 | 2.82                                | 0.08           | 3.56                       | 7.61                                | $4.57 \times 10^{-3}$ | $9.66 \times 10^{-5}$ | 2.64                                | 0.08           | 0.67     | 0.04           | $1.10 \times 10^{-7}$ | 0                     | $2.07 \times 10^{-4}$ | 0.99995 |
|             | 4.50 | 2.63                                | 0.08           | 3.50                       | 7.89                                | $3.43 \times 10^{-3}$ | $7.65 \times 10^{-5}$ | 2.53                                | 0.08           | 0.69     | 0.04           | $1.10 \times 10^{-7}$ | 0                     | $1.72 \times 10^{-4}$ | 0.99996 |
|             | 4.75 | 2.48                                | 0.08           | 3.47                       | 8.54                                | $2.63 \times 10^{-3}$ | $6.79 \times 10^{-5}$ | 2.43                                | 0.08           | 0.64     | 0.05           | $1.10 \times 10^{-7}$ | 0                     | $1.70 \times 10^{-4}$ | 0.99995 |
|             | 5.00 | 2.32                                | 0.10           | 3.45                       | 10.75                               | $2.04 \times 10^{-3}$ | $6.50 \times 10^{-5}$ | 2.36                                | 0.10           | 0.64     | 0.06           | $1.10 \times 10^{-7}$ | 0                     | $1.81 \times 10^{-4}$ | 0.99995 |
|             | 5.50 | 2.05                                | 0.12           | 3.47                       | 13.16                               | $1.24 \times 10^{-3}$ | $5.92 \times 10^{-5}$ | 2.22                                | 0.12           | 0.60     | 0.09           | $1.10 \times 10^{-7}$ | 0                     | $1.78 \times 10^{-4}$ | 0.99994 |
|             | 6.00 | 1.82                                | 0.17           | 3.61                       | 18.79                               | $7.51 \times 10^{-4}$ | $6.42 \times 10^{-5}$ | 2.11                                | 0.18           | 0.57     | 0.15           | $1.10 \times 10^{-7}$ | 0                     | $1.89 \times 10^{-4}$ | 0.99993 |
|             | 6.50 | 1.58                                | 0.29           | 3.81                       | 30.01                               | $4.66 \times 10^{-4}$ | $7.92 \times 10^{-5}$ | 2.07                                | 0.29           | 0.55     | 0.25           | $1.10 \times 10^{-7}$ | 0                     | $1.94 \times 10^{-4}$ | 0.99992 |
|             | 7.00 | 1.27                                | 0.39           | 3.89                       | 45.12                               | $3.44 \times 10^{-4}$ | $9.75 \times 10^{-5}$ | 2.12                                | 0.39           | 0.54     | 0.33           | $1.10 \times 10^{-7}$ | 0                     | $1.80 \times 10^{-4}$ | 0.99992 |
|             | 7.50 | 0.95                                | 0.30           | 3.71                       | 48.53                               | $3.29 \times 10^{-4}$ | $9.39 \times 10^{-5}$ | 2.23                                | 0.30           | 0.53     | 0.25           | $1.10 \times 10^{-7}$ | 0                     | $1.21 \times 10^{-4}$ | 0.99994 |
|             | 8.00 | 0.70                                | 0.19           | 3.42                       | 45.91                               | $3.35 \times 10^{-4}$ | $8.33 \times 10^{-5}$ | 2.28                                | 0.19           | 0.51     | 0.19           | $1.10 \times 10^{-7}$ | 0                     | $8.29 \times 10^{-5}$ | 0.99996 |
|             | 8.50 | 0.53                                | 0.14           | 3.16                       | 45.54                               | $3.29 \times 10^{-4}$ | $7.71 \times 10^{-5}$ | 2.28                                | 0.14           | 0.49     | 0.15           | $1.10 \times 10^{-7}$ | 0                     | $6.06 \times 10^{-5}$ | 0.99997 |



**Table S5:** Fitting parameters for the two relaxation Cole-Cole model for the frequency dependence of  $\chi$  of  $\mathbf{2}_{\text{open}}$  in the solid state in a 1000 Oe field.

$\chi_{\text{adia}}$  was fixed at 0

| Temperature |      | $\chi_{\text{adia}}$                |                | $\chi_{\text{iso}}$                 |                | $\alpha$                   |                                     | $\tau$                |                       | Chisqr                | RR      |
|-------------|------|-------------------------------------|----------------|-------------------------------------|----------------|----------------------------|-------------------------------------|-----------------------|-----------------------|-----------------------|---------|
| K           |      | $\text{cm}^3 \cdot \text{mol}^{-1}$ |                | $\text{cm}^3 \cdot \text{mol}^{-1}$ |                | s                          |                                     | s                     |                       |                       |         |
|             |      | Value                               | Standard Error | Value                               | Standard Error | Value ( $\times 10^{-1}$ ) | Standard Error ( $\times 10^{-3}$ ) | Value                 | Standard Error        |                       |         |
| 0 Oe        | 1.85 | 2.57                                | 0.20           | 11.48                               | 0.21           | 2.27                       | 7.49                                | $1.23 \times 10^{-4}$ | $4.26 \times 10^{-6}$ | $4.32 \times 10^{-3}$ | 0.99988 |
|             | 2.00 | 2.36                                | 0.19           | 10.64                               | 0.20           | 2.26                       | 7.46                                | $1.18 \times 10^{-4}$ | $4.16 \times 10^{-6}$ | $3.56 \times 10^{-3}$ | 0.99989 |
|             | 2.15 | 2.24                                | 0.17           | 9.85                                | 0.18           | 2.25                       | 7.18                                | $1.15 \times 10^{-4}$ | $3.95 \times 10^{-6}$ | $2.77 \times 10^{-3}$ | 0.99999 |
|             | 2.30 | 1.95                                | 0.18           | 9.46                                | 0.19           | 2.25                       | 7.57                                | $1.09 \times 10^{-4}$ | $4.05 \times 10^{-6}$ | $2.69 \times 10^{-3}$ | 0.99989 |
|             | 2.45 | 2.04                                | 0.17           | 8.64                                | 0.18           | 2.19                       | 7.92                                | $1.09 \times 10^{-4}$ | $4.17 \times 10^{-6}$ | $2.48 \times 10^{-3}$ | 0.99988 |
|             | 2.60 | 1.93                                | 0.16           | 8.14                                | 0.16           | 2.17                       | 7.57                                | $1.05 \times 10^{-4}$ | $3.90 \times 10^{-6}$ | $1.93 \times 10^{-3}$ | 0.99999 |
|             | 2.75 | 1.99                                | 0.15           | 7.53                                | 0.15           | 2.12                       | 7.45                                | $1.04 \times 10^{-4}$ | $3.78 \times 10^{-6}$ | $1.60 \times 10^{-3}$ | 0.99991 |
|             | 2.90 | 1.90                                | 0.15           | 7.12                                | 0.16           | 2.09                       | 8.09                                | $9.99 \times 10^{-5}$ | $4.00 \times 10^{-6}$ | $1.62 \times 10^{-3}$ | 0.99999 |
|             | 3.05 | 1.99                                | 0.13           | 6.60                                | 0.13           | 2.09                       | 7.23                                | $9.84 \times 10^{-5}$ | $3.55 \times 10^{-6}$ | $1.10 \times 10^{-3}$ | 0.99992 |
|             | 3.20 | 1.82                                | 0.12           | 6.36                                | 0.13           | 2.09                       | 6.88                                | $9.15 \times 10^{-5}$ | $3.28 \times 10^{-6}$ | $8.57 \times 10^{-4}$ | 0.99993 |
|             | 3.35 | 1.44                                | 0.14           | 6.38                                | 0.14           | 2.12                       | 7.23                                | $8.19 \times 10^{-5}$ | $3.30 \times 10^{-6}$ | $8.40 \times 10^{-4}$ | 0.99993 |
|             | 3.50 | 1.89                                | 0.12           | 5.59                                | 0.12           | 1.98                       | 7.46                                | $8.92 \times 10^{-5}$ | $3.42 \times 10^{-6}$ | $7.67 \times 10^{-4}$ | 0.99993 |
|             | 3.75 | 2.05                                | 0.10           | 4.93                                | 0.11           | 1.87                       | 7.53                                | $8.99 \times 10^{-5}$ | $3.38 \times 10^{-6}$ | $6.21 \times 10^{-4}$ | 0.99994 |
|             | 4.00 | 2.04                                | 0.09           | 4.52                                | 0.10           | 1.89                       | 7.14                                | $8.51 \times 10^{-5}$ | $3.14 \times 10^{-6}$ | $4.38 \times 10^{-4}$ | 0.99995 |
|             | 4.25 | 1.60                                | 0.11           | 4.58                                | 0.11           | 1.87                       | 7.22                                | $7.28 \times 10^{-5}$ | $2.97 \times 10^{-6}$ | $3.85 \times 10^{-4}$ | 0.99995 |
|             | 4.50 | 2.21                                | 0.07           | 3.63                                | 0.07           | 1.79                       | 6.87                                | $8.37 \times 10^{-5}$ | $2.93 \times 10^{-6}$ | $2.60 \times 10^{-4}$ | 0.99996 |
|             | 4.75 | 1.74                                | 0.09           | 3.80                                | 0.09           | 1.77                       | 7.19                                | $7.10 \times 10^{-5}$ | $2.87 \times 10^{-6}$ | $2.56 \times 10^{-4}$ | 0.99996 |
|             | 5.00 | 2.03                                | 0.07           | 3.23                                | 0.07           | 1.75                       | 6.85                                | $7.30 \times 10^{-5}$ | $2.76 \times 10^{-6}$ | $1.74 \times 10^{-4}$ | 0.99997 |
|             | 5.50 | 1.95                                | 0.08           | 2.84                                | 0.08           | 1.51                       | 9.05                                | $7.02 \times 10^{-5}$ | $3.41 \times 10^{-6}$ | $2.28 \times 10^{-4}$ | 0.99995 |
|             | 6.00 | 1.83                                | 0.10           | 2.58                                | 0.10           | 1.45                       | 11.23                               | $6.32 \times 10^{-5}$ | $4.04 \times 10^{-6}$ | $2.54 \times 10^{-4}$ | 0.99994 |
|             | 6.50 | 1.75                                | 0.10           | 2.33                                | 0.10           | 1.43                       | 11.74                               | $5.79 \times 10^{-5}$ | $4.09 \times 10^{-6}$ | $2.01 \times 10^{-4}$ | 0.99995 |

**Table S6:** Fitting parameters for the Cole-Cole model for the frequency dependence of  $\chi''$  of  $\mathbf{2}_{\text{close}}$  in the solid state in a 0 Oe field.

| Temperature |      | $\chi_{\text{adia}}$                |                                     | $\chi_{\text{iso}}$                 |                                     | $\beta$                    |                                     | $\alpha$                   |                                     | $\tau$                |                       | $\tau_{\text{corrected}}$ | Chisqr                | RR      |
|-------------|------|-------------------------------------|-------------------------------------|-------------------------------------|-------------------------------------|----------------------------|-------------------------------------|----------------------------|-------------------------------------|-----------------------|-----------------------|---------------------------|-----------------------|---------|
| K           |      | $\text{cm}^3 \cdot \text{mol}^{-1}$ |                                     | $\text{cm}^3 \cdot \text{mol}^{-1}$ |                                     |                            |                                     |                            |                                     | s                     |                       | s                         |                       |         |
|             |      | Value                               | Standard Error ( $\times 10^{-2}$ ) | Value                               | Standard Error ( $\times 10^{-2}$ ) | Value ( $\times 10^{-1}$ ) | Standard Error ( $\times 10^{-2}$ ) | Value ( $\times 10^{-1}$ ) | Standard Error ( $\times 10^{-3}$ ) | Value                 | Standard Error        | Value                     |                       |         |
| 1000 Oe     | 1.85 | 0.32                                | 1.43                                | 13.76                               | 5.12                                | 0.73                       | 1.43                                | 4.68                       | 5.51                                | $4.26 \times 10^{-1}$ | $1.31 \times 10^{-2}$ | $2.39 \times 10^{-1}$     | $2.52 \times 10^{-4}$ | 0.99997 |
|             | 2.00 | 0.26                                | 1.54                                | 12.73                               | 4.40                                | 0.66                       | 1.30                                | 4.42                       | 5.86                                | $4.30 \times 10^{-1}$ | $1.25 \times 10^{-2}$ | $2.07 \times 10^{-1}$     | $2.63 \times 10^{-4}$ | 0.99996 |
|             | 2.15 | 0.28                                | 1.48                                | 11.86                               | 3.59                                | 0.65                       | 1.22                                | 4.34                       | 5.51                                | $3.71 \times 10^{-1}$ | $1.04 \times 10^{-2}$ | $1.76 \times 10^{-1}$     | $2.33 \times 10^{-4}$ | 0.99996 |
|             | 2.30 | 0.30                                | 1.85                                | 11.19                               | 3.87                                | 0.65                       | 1.50                                | 4.28                       | 6.69                                | $3.16 \times 10^{-1}$ | $1.11 \times 10^{-2}$ | $1.49 \times 10^{-1}$     | $3.54 \times 10^{-4}$ | 0.99994 |
|             | 2.45 | 0.30                                | 1.79                                | 10.48                               | 3.08                                | 0.62                       | 1.34                                | 4.12                       | 6.25                                | $2.74 \times 10^{-1}$ | $8.90 \times 10^{-3}$ | $1.23 \times 10^{-1}$     | $3.14 \times 10^{-4}$ | 0.99995 |
|             | 2.60 | 0.30                                | 2.04                                | 9.87                                | 2.95                                | 0.61                       | 1.45                                | 4.02                       | 6.81                                | $2.27 \times 10^{-1}$ | $8.21 \times 10^{-3}$ | $9.97 \times 10^{-2}$     | $3.86 \times 10^{-4}$ | 0.99993 |
|             | 2.75 | 0.25                                | 1.66                                | 9.32                                | 1.99                                | 0.56                       | 0.99                                | 3.73                       | 5.26                                | $2.09 \times 10^{-1}$ | $5.39 \times 10^{-3}$ | $8.28 \times 10^{-2}$     | $2.27 \times 10^{-4}$ | 0.99996 |
|             | 2.90 | 0.25                                | 2.15                                | 8.82                                | 2.30                                | 0.55                       | 1.21                                | 3.61                       | 6.48                                | $1.72 \times 10^{-1}$ | $5.54 \times 10^{-3}$ | $6.67 \times 10^{-2}$     | $3.54 \times 10^{-4}$ | 0.99993 |
|             | 3.05 | 0.31                                | 1.97                                | 8.34                                | 1.98                                | 0.56                       | 1.13                                | 3.56                       | 5.76                                | $1.33 \times 10^{-1}$ | $4.05 \times 10^{-3}$ | $5.36 \times 10^{-2}$     | $2.93 \times 10^{-4}$ | 0.99994 |
|             | 3.20 | 0.27                                | 2.31                                | 7.93                                | 2.19                                | 0.52                       | 1.17                                | 3.33                       | 6.42                                | $1.16 \times 10^{-1}$ | $3.75 \times 10^{-3}$ | $4.37 \times 10^{-2}$     | $3.57 \times 10^{-4}$ | 0.99993 |
|             | 3.35 | 0.25                                | 2.27                                | 7.58                                | 2.09                                | 0.51                       | 1.08                                | 3.24                       | 5.96                                | $9.53 \times 10^{-2}$ | $2.91 \times 10^{-3}$ | $3.52 \times 10^{-2}$     | $3.05 \times 10^{-4}$ | 0.99994 |
|             | 3.50 | 0.21                                | 3.34                                | 7.27                                | 3.03                                | 0.48                       | 1.44                                | 3.10                       | 8.27                                | $8.22 \times 10^{-2}$ | $3.43 \times 10^{-3}$ | $2.88 \times 10^{-2}$     | $5.60 \times 10^{-4}$ | 0.99988 |
|             | 3.75 | 0.27                                | 2.99                                | 6.72                                | 2.73                                | 0.49                       | 1.28                                | 2.98                       | 7.07                                | $5.76 \times 10^{-2}$ | $2.14 \times 10^{-3}$ | $2.06 \times 10^{-2}$     | $3.99 \times 10^{-4}$ | 0.99991 |
|             | 4.00 | 0.27                                | 2.92                                | 6.28                                | 2.69                                | 0.47                       | 1.18                                | 2.86                       | 6.47                                | $4.29 \times 10^{-2}$ | $1.49 \times 10^{-3}$ | $1.50 \times 10^{-2}$     | $3.09 \times 10^{-4}$ | 0.99993 |
|             | 4.25 | 0.24                                | 4.76                                | 5.93                                | 4.44                                | 0.44                       | 1.69                                | 2.66                       | 9.8                                 | $3.46 \times 10^{-2}$ | $1.77 \times 10^{-3}$ | $1.13 \times 10^{-2}$     | $6.22 \times 10^{-4}$ | 0.99985 |
|             | 4.50 | 0.05                                | 4.58                                | 5.75                                | 4.34                                | 0.38                       | 1.24                                | 2.40                       | 8.15                                | $2.96 \times 10^{-2}$ | $1.18 \times 10^{-3}$ | $8.34 \times 10^{-3}$     | $3.60 \times 10^{-4}$ | 0.99991 |
|             | 4.75 | 0.02                                | 3.86                                | 5.48                                | 3.69                                | 0.36                       | 0.96                                | 2.34                       | 6.29                                | $2.36 \times 10^{-2}$ | $7.39 \times 10^{-4}$ | $6.33 \times 10^{-3}$     | $1.86 \times 10^{-4}$ | 0.99995 |
|             | 5.00 | 0.10                                | 4.21                                | 5.14                                | 4.05                                | 0.36                       | 1.06                                | 2.29                       | 6.63                                | $1.82 \times 10^{-2}$ | $6.20 \times 10^{-4}$ | $4.90 \times 10^{-3}$     | $1.84 \times 10^{-4}$ | 0.99995 |
|             | 5.50 | 0.00                                | 5.15                                | 4.78                                | 5.03                                | 0.32                       | 1.04                                | 2.13                       | 6.61                                | $1.23 \times 10^{-2}$ | $4.25 \times 10^{-4}$ | $2.92 \times 10^{-3}$     | $1.32 \times 10^{-4}$ | 0.99996 |
|             | 6.00 | 0.00                                | 13.76                               | 4.39                                | 13.53                               | 0.30                       | 2.51                                | 2.17                       | 14.45                               | $7.90 \times 10^{-3}$ | $6.59 \times 10^{-4}$ | $1.73 \times 10^{-3}$     | $4.62 \times 10^{-4}$ | 0.99984 |
|             | 6.50 | 0.00                                | 17.58                               | 4.07                                | 17.39                               | 0.30                       | 3.08                                | 2.45                       | 14.02                               | $4.75 \times 10^{-3}$ | $4.75 \times 10^{-4}$ | $9.65 \times 10^{-4}$     | $3.17 \times 10^{-4}$ | 0.99988 |
|             | 7.00 | 0.00                                | 24.27                               | 3.78                                | 24.11                               | 0.25                       | 3.35                                | 2.31                       | 15.49                               | $3.71 \times 10^{-3}$ | $4.15 \times 10^{-4}$ | $6.25 \times 10^{-4}$     | $2.44 \times 10^{-4}$ | 0.9999  |
|             | 7.50 | 0                                   | 0                                   | 3.53                                | 0.67                                | 0.26                       | 1.44                                | 2.62                       | 19.89                               | $2.12 \times 10^{-3}$ | $1.99 \times 10^{-4}$ | $3.34 \times 10^{-4}$     | $6.37 \times 10^{-4}$ | 0.99972 |
|             | 8.00 | 0                                   | 0                                   | 3.31                                | 0.41                                | 0.20                       | 0.90                                | 2.30                       | 16.63                               | $1.88 \times 10^{-3}$ | $1.33 \times 10^{-4}$ | $2.35 \times 10^{-4}$     | $2.63 \times 10^{-4}$ | 0.99988 |

**Table S7:** Fitting parameters for the Havriliak-Negami model for the frequency dependence of  $\chi''$  of  $\mathbf{2}_{\text{close}}$  in the solid state in a 1000 Oe field.

| Temperature |      | $\chi_{\text{iso}}$                 |                                        | $\beta$                       |                                        | $\alpha$                      |                                        | $\tau$                        |                                        | $\tau_{\text{corrected}}$     | Chisqr                | RR      |
|-------------|------|-------------------------------------|----------------------------------------|-------------------------------|----------------------------------------|-------------------------------|----------------------------------------|-------------------------------|----------------------------------------|-------------------------------|-----------------------|---------|
| K           |      | $\text{cm}^3 \cdot \text{mol}^{-1}$ |                                        |                               |                                        |                               |                                        | s                             |                                        | s                             |                       |         |
|             |      | Value                               | Standard Error<br>( $\times 10^{-3}$ ) | Value<br>( $\times 10^{-1}$ ) | Standard Error<br>( $\times 10^{-2}$ ) | Value<br>( $\times 10^{-1}$ ) | Standard Error<br>( $\times 10^{-3}$ ) | Value<br>( $\times 10^{-4}$ ) | Standard Error<br>( $\times 10^{-5}$ ) | Value<br>( $\times 10^{-4}$ ) |                       |         |
| 0 Oe        | 1.85 | 8.95                                | 14.86                                  | 5.23                          | 1.57                                   | 2.50                          | 9.07                                   | 8.73                          | 4.36                                   | 3.67                          | $1.72 \times 10^{-3}$ | 0.99986 |
|             | 2.00 | 8.22                                | 13.93                                  | 5.28                          | 1.67                                   | 2.48                          | 9.40                                   | 8.03                          | 4.22                                   | 3.43                          | $1.56 \times 10^{-3}$ | 0.99985 |
|             | 2.15 | 7.64                                | 11.44                                  | 4.96                          | 1.41                                   | 2.28                          | 8.83                                   | 8.16                          | 3.74                                   | 3.29                          | $1.13 \times 10^{-3}$ | 0.99987 |
|             | 2.30 | 7.26                                | 10.74                                  | 5.04                          | 1.46                                   | 2.31                          | 8.78                                   | 7.55                          | 3.55                                   | 3.10                          | $1.01 \times 10^{-3}$ | 0.99988 |
|             | 2.45 | 6.80                                | 9.13                                   | 5.01                          | 1.35                                   | 2.29                          | 8.11                                   | 7.22                          | 3.15                                   | 2.95                          | $7.45 \times 10^{-4}$ | 0.99999 |
|             | 2.60 | 6.36                                | 8.41                                   | 4.87                          | 1.33                                   | 2.24                          | 8.25                                   | 7.10                          | 3.10                                   | 2.81                          | $6.50 \times 10^{-4}$ | 0.99999 |
|             | 2.75 | 5.98                                | 9.74                                   | 5.18                          | 1.84                                   | 2.34                          | 10.10                                  | 5.98                          | 3.48                                   | 2.54                          | $8.78 \times 10^{-4}$ | 0.99985 |
|             | 2.90 | 5.64                                | 5.82                                   | 4.37                          | 0.96                                   | 1.97                          | 7.09                                   | 7.31                          | 2.47                                   | 2.61                          | $3.39 \times 10^{-4}$ | 0.99994 |
|             | 3.05 | 5.36                                | 7.29                                   | 4.77                          | 1.48                                   | 2.12                          | 9.16                                   | 5.94                          | 2.90                                   | 2.32                          | $5.33 \times 10^{-4}$ | 0.99989 |
|             | 3.20 | 5.10                                | 5.77                                   | 4.58                          | 1.20                                   | 2.00                          | 7.94                                   | 5.93                          | 2.41                                   | 2.23                          | $3.48 \times 10^{-4}$ | 0.99992 |
|             | 3.35 | 4.88                                | 6.22                                   | 4.52                          | 1.39                                   | 1.98                          | 9.22                                   | 5.62                          | 2.67                                   | 2.09                          | $4.13 \times 10^{-4}$ | 0.99999 |
|             | 3.50 | 4.67                                | 4.78                                   | 4.25                          | 1.07                                   | 1.84                          | 7.78                                   | 5.74                          | 2.19                                   | 2.01                          | $2.52 \times 10^{-4}$ | 0.99993 |
|             | 3.75 | 4.37                                | 4.38                                   | 4.49                          | 1.19                                   | 1.84                          | 7.73                                   | 4.72                          | 1.90                                   | 1.77                          | $2.21 \times 10^{-4}$ | 0.99993 |
|             | 4.00 | 4.11                                | 4.40                                   | 4.23                          | 1.25                                   | 1.65                          | 8.86                                   | 4.57                          | 2.00                                   | 1.63                          | $2.38 \times 10^{-4}$ | 0.99992 |
|             | 4.25 | 3.86                                | 4.05                                   | 4.62                          | 1.48                                   | 1.90                          | 8.56                                   | 3.74                          | 1.84                                   | 1.44                          | $1.96 \times 10^{-4}$ | 0.99993 |
|             | 4.50 | 3.61                                | 3.67                                   | 3.93                          | 1.23                                   | 1.38                          | 9.40                                   | 4.05                          | 1.80                                   | 1.37                          | $1.81 \times 10^{-4}$ | 0.99993 |
|             | 4.75 | 3.45                                | 2.79                                   | 3.68                          | 0.97                                   | 1.32                          | 8.00                                   | 3.99                          | 1.48                                   | 1.26                          | $1.07 \times 10^{-4}$ | 0.99995 |
|             | 5.00 | 3.28                                | 2.47                                   | 3.69                          | 0.97                                   | 1.27                          | 7.73                                   | 3.59                          | 1.32                                   | 1.14                          | $8.66 \times 10^{-5}$ | 0.99996 |

**Table S8:** Fitting parameters for the Havriliak-Negami model for the frequency dependence of  $\chi''$  of **2<sub>open</sub>** in the solution state in a 1000 Oe field.

$X_{\text{adia}}$  was fixed at 0

| Temperature |      | $\chi_{\text{adia}}$                |                                           | $\chi_{\text{iso}}$                 |                                           | $\beta$                       |                                           | $\alpha$                      |                                           | $\tau$                |                                           | $\tau_{\text{corrected}}$ | Chisqr                | RR      |
|-------------|------|-------------------------------------|-------------------------------------------|-------------------------------------|-------------------------------------------|-------------------------------|-------------------------------------------|-------------------------------|-------------------------------------------|-----------------------|-------------------------------------------|---------------------------|-----------------------|---------|
| K           |      | $\text{cm}^3 \cdot \text{mol}^{-1}$ |                                           | $\text{cm}^3 \cdot \text{mol}^{-1}$ |                                           |                               |                                           |                               |                                           | s                     |                                           | s                         |                       |         |
|             |      | Value<br>( $\times 10^{-1}$ )       | Standard<br>Error<br>( $\times 10^{-2}$ ) | Value                               | Standard<br>Error<br>( $\times 10^{-2}$ ) | Value<br>( $\times 10^{-1}$ ) | Standard<br>Error<br>( $\times 10^{-2}$ ) | Value<br>( $\times 10^{-1}$ ) | Standard<br>Error<br>( $\times 10^{-3}$ ) | Value                 | Standard<br>Error<br>( $\times 10^{-3}$ ) | Value                     |                       | Value   |
| 1000 Oe     | 1.85 | 2.32                                | 0.85                                      | 9.15                                | 7.39                                      | 5.79                          | 1.44                                      | 4.19                          | 9.81                                      | $1.88 \times 10^0$    | 37.88                                     | $7.35 \times 10^{-1}$     | $9.16 \times 10^{-5}$ | 0.99996 |
|             | 2.00 | 2.40                                | 0.91                                      | 8.37                                | 5.94                                      | 5.44                          | 1.33                                      | 3.82                          | 10.11                                     | $1.52 \times 10^0$    | 30.94                                     | $5.68 \times 10^{-1}$     | $1.14 \times 10^{-4}$ | 0.99995 |
|             | 2.15 | 2.29                                | 0.70                                      | 7.78                                | 3.40                                      | 5.17                          | 0.89                                      | 3.50                          | 7.21                                      | $1.23 \times 10^0$    | 18.27                                     | $4.44 \times 10^{-1}$     | $6.85 \times 10^{-5}$ | 0.99997 |
|             | 2.30 | 2.01                                | 1.37                                      | 7.26                                | 4.87                                      | 4.68                          | 1.39                                      | 3.01                          | 13.34                                     | $1.07 \times 10^0$    | 26.8                                      | $3.62 \times 10^{-1}$     | $2.66 \times 10^{-4}$ | 0.99987 |
|             | 2.45 | 2.15                                | 1.41                                      | 6.63                                | 3.58                                      | 4.57                          | 1.29                                      | 2.75                          | 12.46                                     | $7.86 \times 10^{-1}$ | 20.39                                     | $2.67 \times 10^{-1}$     | $2.90 \times 10^{-4}$ | 0.99986 |
|             | 2.60 | 2.07                                | 1.12                                      | 6.27                                | 2.20                                      | 4.59                          | 0.96                                      | 2.72                          | 8.82                                      | $5.95 \times 10^{-1}$ | 12.52                                     | $2.04 \times 10^{-1}$     | $1.72 \times 10^{-4}$ | 0.99992 |
|             | 2.75 | 2.43                                | 0.84                                      | 5.92                                | 1.37                                      | 4.79                          | 0.73                                      | 2.75                          | 6.06                                      | $4.29 \times 10^{-1}$ | 7.31                                      | $1.55 \times 10^{-1}$     | $9.76 \times 10^{-5}$ | 0.99995 |
|             | 2.90 | 2.48                                | 0.77                                      | 5.59                                | 1.04                                      | 4.70                          | 0.63                                      | 2.57                          | 5.17                                      | $3.29 \times 10^{-1}$ | 5.05                                      | $1.19 \times 10^{-1}$     | $8.09 \times 10^{-5}$ | 0.99996 |
|             | 3.05 | 2.05                                | 1.59                                      | 5.35                                | 1.81                                      | 4.46                          | 1.12                                      | 2.38                          | 9.65                                      | $2.66 \times 10^{-1}$ | 7.73                                      | $9.23 \times 10^{-2}$     | $2.96 \times 10^{-4}$ | 0.99986 |
|             | 3.20 | 2.22                                | 1.19                                      | 5.07                                | 1.24                                      | 4.45                          | 0.81                                      | 2.26                          | 6.76                                      | $2.04 \times 10^{-1}$ | 4.37                                      | $7.16 \times 10^{-2}$     | $1.57 \times 10^{-4}$ | 0.99992 |
|             | 3.35 | 2.50                                | 0.78                                      | 4.82                                | 0.78                                      | 4.55                          | 0.54                                      | 2.24                          | 4.23                                      | $1.54 \times 10^{-1}$ | 2.22                                      | $5.57 \times 10^{-2}$     | $6.46 \times 10^{-5}$ | 0.99997 |
|             | 3.50 | 2.36                                | 1.07                                      | 4.62                                | 1.03                                      | 4.44                          | 0.69                                      | 2.14                          | 5.45                                      | $1.23 \times 10^{-1}$ | 2.34                                      | $4.38 \times 10^{-2}$     | $1.07 \times 10^{-4}$ | 0.99995 |
|             | 3.75 | 2.32                                | 1.02                                      | 4.32                                | 0.96                                      | 4.32                          | 0.61                                      | 1.99                          | 4.73                                      | $8.55 \times 10^{-2}$ | 1.46                                      | $3.00 \times 10^{-2}$     | $7.89 \times 10^{-5}$ | 0.99996 |
|             | 4.00 | 1.88                                | 2.05                                      | 4.11                                | 1.93                                      | 3.94                          | 1.01                                      | 1.66                          | 8.60                                      | $6.46 \times 10^{-2}$ | 1.92                                      | $2.12 \times 10^{-2}$     | $2.40 \times 10^{-4}$ | 0.99987 |
|             | 4.25 | 1.83                                | 2.53                                      | 3.82                                | 2.37                                      | 4.12                          | 1.34                                      | 2.03                          | 9.65                                      | $4.50 \times 10^{-2}$ | 1.78                                      | $1.48 \times 10^{-2}$     | $2.65 \times 10^{-4}$ | 0.99984 |
|             | 4.50 | 2.34                                | 1.62                                      | 3.59                                | 1.53                                      | 4.09                          | 0.86                                      | 1.85                          | 5.99                                      | $3.28 \times 10^{-2}$ | 0.81                                      | $1.09 \times 10^{-2}$     | $9.62 \times 10^{-5}$ | 0.99994 |
|             | 4.75 | 1.32                                | 3.06                                      | 3.47                                | 2.94                                      | 3.58                          | 1.24                                      | 1.61                          | 9.79                                      | $2.71 \times 10^{-2}$ | 1.03                                      | $7.96 \times 10^{-3}$     | $2.09 \times 10^{-4}$ | 0.99987 |
|             | 5.00 | 1.57                                | 2.01                                      | 3.26                                | 1.93                                      | 3.58                          | 0.81                                      | 1.67                          | 5.95                                      | $2.01 \times 10^{-2}$ | 0.50                                      | $5.86 \times 10^{-3}$     | $6.77 \times 10^{-5}$ | 0.99995 |
|             | 5.50 | 0.00                                | 6.00                                      | 3.13                                | 5.87                                      | 2.98                          | 1.66                                      | 1.57                          | 12.76                                     | $1.31 \times 10^{-2}$ | 0.72                                      | $3.11 \times 10^{-3}$     | $2.13 \times 10^{-4}$ | 0.99984 |
|             | 6.00 | 0.00                                | 5.91                                      | 2.87                                | 5.82                                      | 2.91                          | 1.54                                      | 1.85                          | 9.67                                      | $7.62 \times 10^{-3}$ | 0.39                                      | $1.68 \times 10^{-3}$     | $8.84 \times 10^{-5}$ | 0.99993 |
|             | 6.50 | 0.00                                | 13.02                                     | 2.66                                | 12.91                                     | 2.81                          | 3.09                                      | 2.18                          | 15.06                                     | $4.30 \times 10^{-3}$ | 0.43                                      | $8.48 \times 10^{-4}$     | $1.46 \times 10^{-4}$ | 0.99988 |
|             | 7.00 | 0                                   | 0                                         | 2.47                                | 0.62                                      | 2.83                          | 1.92                                      | 2.55                          | 24.20                                     | $2.17 \times 10^{-3}$ | 0.24                                      | $3.98 \times 10^{-4}$     | $5.58 \times 10^{-4}$ | 0.99949 |

**Table S9:** Fitting parameters for the Havriliak-Negami model for the frequency dependence of  $\chi''$  of  $\mathbf{2}_{\text{open}}$  in the solution state in a 1000 Oe field.

| Temperature |      | $\chi_{\text{adia}}$                |                                        | $\chi_{\text{iso}}$                 |                                        | $\alpha$                      |                                        | $\tau$                        |                                        | Chisqr                | RR      |
|-------------|------|-------------------------------------|----------------------------------------|-------------------------------------|----------------------------------------|-------------------------------|----------------------------------------|-------------------------------|----------------------------------------|-----------------------|---------|
| K           |      | $\text{cm}^3 \cdot \text{mol}^{-1}$ |                                        | $\text{cm}^3 \cdot \text{mol}^{-1}$ |                                        |                               |                                        | s                             |                                        |                       |         |
|             |      | Value                               | Standard Error<br>( $\times 10^{-1}$ ) | Value                               | Standard Error<br>( $\times 10^{-1}$ ) | Value<br>( $\times 10^{-1}$ ) | Standard Error<br>( $\times 10^{-3}$ ) | Value<br>( $\times 10^{-5}$ ) | Standard Error<br>( $\times 10^{-6}$ ) |                       | Value   |
| 0 Oe        | 1.85 | 2.57                                | 2.05                                   | 11.48                               | 2.12                                   | 2.27                          | 7.49                                   | 12.26                         | 4.26                                   | $4.32 \times 10^{-3}$ | 0.99988 |
|             | 2.00 | 2.36                                | 1.93                                   | 10.64                               | 1.99                                   | 2.26                          | 7.46                                   | 11.82                         | 4.16                                   | $3.56 \times 10^{-3}$ | 0.99989 |
|             | 2.15 | 2.24                                | 1.74                                   | 9.85                                | 1.80                                   | 2.25                          | 7.18                                   | 11.53                         | 3.95                                   | $2.77 \times 10^{-3}$ | 0.9999  |
|             | 2.30 | 1.95                                | 1.82                                   | 9.46                                | 1.88                                   | 2.25                          | 7.57                                   | 10.90                         | 4.05                                   | $2.69 \times 10^{-3}$ | 0.99989 |
|             | 2.45 | 2.04                                | 1.73                                   | 8.64                                | 1.78                                   | 2.19                          | 7.92                                   | 10.93                         | 4.17                                   | $2.48 \times 10^{-3}$ | 0.99988 |
|             | 2.60 | 1.93                                | 1.60                                   | 8.14                                | 1.64                                   | 2.17                          | 7.57                                   | 10.46                         | 3.90                                   | $1.93 \times 10^{-3}$ | 0.9999  |
|             | 2.75 | 1.99                                | 1.45                                   | 7.53                                | 1.49                                   | 2.12                          | 7.45                                   | 10.43                         | 3.78                                   | $1.60 \times 10^{-3}$ | 0.99991 |
|             | 2.90 | 1.90                                | 1.53                                   | 7.12                                | 1.57                                   | 2.09                          | 8.09                                   | 9.99                          | 4.00                                   | $1.62 \times 10^{-3}$ | 0.9999  |
|             | 3.05 | 1.99                                | 1.28                                   | 6.60                                | 1.31                                   | 2.09                          | 7.23                                   | 9.84                          | 3.55                                   | $1.10 \times 10^{-3}$ | 0.99992 |
|             | 3.20 | 1.82                                | 1.22                                   | 6.36                                | 1.25                                   | 2.09                          | 6.88                                   | 9.15                          | 3.28                                   | $8.57 \times 10^{-4}$ | 0.99993 |
|             | 3.35 | 1.44                                | 1.38                                   | 6.38                                | 1.41                                   | 2.12                          | 7.23                                   | 8.19                          | 3.30                                   | $8.40 \times 10^{-4}$ | 0.99993 |
|             | 3.50 | 1.89                                | 1.18                                   | 5.59                                | 1.20                                   | 1.98                          | 7.46                                   | 8.92                          | 3.42                                   | $7.67 \times 10^{-4}$ | 0.99993 |
|             | 3.75 | 2.05                                | 1.04                                   | 4.93                                | 1.06                                   | 1.87                          | 7.53                                   | 8.99                          | 3.38                                   | $6.21 \times 10^{-4}$ | 0.99994 |
|             | 4.00 | 2.04                                | 0.93                                   | 4.52                                | 0.95                                   | 1.89                          | 7.14                                   | 8.51                          | 3.14                                   | $4.38 \times 10^{-4}$ | 0.99995 |
|             | 4.25 | 1.60                                | 1.06                                   | 4.58                                | 1.08                                   | 1.87                          | 7.22                                   | 7.28                          | 2.97                                   | $3.85 \times 10^{-4}$ | 0.99995 |
|             | 4.50 | 2.21                                | 0.73                                   | 3.63                                | 0.74                                   | 1.79                          | 6.87                                   | 8.37                          | 2.93                                   | $2.60 \times 10^{-4}$ | 0.99996 |
|             | 4.75 | 1.74                                | 0.89                                   | 3.80                                | 0.90                                   | 1.77                          | 7.19                                   | 7.10                          | 2.87                                   | $2.56 \times 10^{-4}$ | 0.99996 |
|             | 5.00 | 2.03                                | 0.70                                   | 3.23                                | 0.72                                   | 1.75                          | 6.85                                   | 7.30                          | 2.76                                   | $1.74 \times 10^{-4}$ | 0.99997 |
|             | 5.50 | 1.95                                | 0.84                                   | 2.84                                | 0.85                                   | 1.51                          | 9.05                                   | 7.02                          | 3.41                                   | $2.28 \times 10^{-4}$ | 0.99995 |
|             | 6.00 | 1.83                                | 1.02                                   | 2.58                                | 1.03                                   | 1.45                          | 11.23                                  | 6.32                          | 4.04                                   | $2.54 \times 10^{-4}$ | 0.99994 |
|             | 6.50 | 1.75                                | 1.02                                   | 2.33                                | 1.03                                   | 1.43                          | 11.74                                  | 5.79                          | 4.09                                   | $2.01 \times 10^{-4}$ | 0.99995 |

**Table S10:** Fitting parameters for the Cole-Cole model for the frequency dependence of  $\chi''$  of  $\mathbf{2}_{\text{close}}$  in the solution state in a 0 Oe field.

| Temperature |      | $\chi_{\text{adia}}$                |                                           | $\chi_{\text{iso}}$                 |                                           | $\beta$                       |                                           | $\alpha$                      |                                           | $\tau$                        |                                           | $\tau_{\text{corrected}}$ | Chisqr                        | RR      |
|-------------|------|-------------------------------------|-------------------------------------------|-------------------------------------|-------------------------------------------|-------------------------------|-------------------------------------------|-------------------------------|-------------------------------------------|-------------------------------|-------------------------------------------|---------------------------|-------------------------------|---------|
| K           |      | $\text{cm}^3 \cdot \text{mol}^{-1}$ |                                           | $\text{cm}^3 \cdot \text{mol}^{-1}$ |                                           |                               |                                           |                               |                                           | s                             |                                           | s                         |                               |         |
|             |      | Value<br>( $\times 10^{-1}$ )       | Standard<br>Error<br>( $\times 10^{-2}$ ) | Value                               | Standard<br>Error<br>( $\times 10^{-2}$ ) | Value<br>( $\times 10^{-1}$ ) | Standard<br>Error<br>( $\times 10^{-2}$ ) | Value<br>( $\times 10^{-1}$ ) | Standard<br>Error<br>( $\times 10^{-3}$ ) | Value<br>( $\times 10^{-2}$ ) | Standard<br>Error<br>( $\times 10^{-3}$ ) | Value                     | Value<br>( $\times 10^{-4}$ ) | Value   |
| 1000 Oe     | 1.85 | 3.24                                | 1.43                                      | 13.76                               | 5.12                                      | 7.34                          | 1.43                                      | 4.68                          | 5.51                                      | 42.62                         | 13.09                                     | $2.39 \times 10^{-1}$     | 2.52                          | 0.99997 |
|             | 2.00 | 2.62                                | 1.54                                      | 12.73                               | 4.40                                      | 6.65                          | 1.30                                      | 4.42                          | 5.86                                      | 43.03                         | 12.47                                     | $2.07 \times 10^{-1}$     | 2.63                          | 0.99996 |
|             | 2.15 | 2.81                                | 1.48                                      | 11.86                               | 3.59                                      | 6.55                          | 1.22                                      | 4.34                          | 5.51                                      | 37.10                         | 10.38                                     | $1.76 \times 10^{-1}$     | 2.33                          | 0.99996 |
|             | 2.30 | 2.98                                | 1.85                                      | 11.19                               | 3.87                                      | 6.50                          | 1.50                                      | 4.28                          | 6.69                                      | 31.62                         | 11.14                                     | $1.49 \times 10^{-1}$     | 3.54                          | 0.99994 |
|             | 2.45 | 3.00                                | 1.79                                      | 10.48                               | 3.08                                      | 6.25                          | 1.34                                      | 4.12                          | 6.25                                      | 27.38                         | 8.90                                      | $1.23 \times 10^{-1}$     | 3.14                          | 0.99995 |
|             | 2.60 | 3.00                                | 2.04                                      | 9.87                                | 2.95                                      | 6.12                          | 1.45                                      | 4.02                          | 6.81                                      | 22.67                         | 8.21                                      | $9.97 \times 10^{-2}$     | 3.86                          | 0.99993 |
|             | 2.75 | 2.48                                | 1.66                                      | 9.32                                | 1.99                                      | 5.60                          | 0.99                                      | 3.73                          | 5.26                                      | 20.89                         | 5.39                                      | $8.28 \times 10^{-2}$     | 2.27                          | 0.99996 |
|             | 2.90 | 2.47                                | 2.15                                      | 8.82                                | 2.30                                      | 5.47                          | 1.21                                      | 3.61                          | 6.48                                      | 17.16                         | 5.54                                      | $6.67 \times 10^{-2}$     | 3.54                          | 0.99993 |
|             | 3.05 | 3.05                                | 1.97                                      | 8.34                                | 1.98                                      | 5.56                          | 1.13                                      | 3.56                          | 5.76                                      | 13.34                         | 4.05                                      | $5.36 \times 10^{-2}$     | 2.93                          | 0.99994 |
|             | 3.20 | 2.69                                | 2.31                                      | 7.93                                | 2.19                                      | 5.22                          | 1.17                                      | 3.33                          | 6.42                                      | 11.59                         | 3.75                                      | $4.37 \times 10^{-2}$     | 3.57                          | 0.99993 |
|             | 3.35 | 2.54                                | 2.27                                      | 7.58                                | 2.09                                      | 5.10                          | 1.08                                      | 3.24                          | 5.96                                      | 9.53                          | 2.91                                      | $3.52 \times 10^{-2}$     | 3.05                          | 0.99994 |
|             | 3.50 | 2.09                                | 3.34                                      | 7.27                                | 3.03                                      | 4.85                          | 1.44                                      | 3.10                          | 8.27                                      | 8.22                          | 3.43                                      | $2.88 \times 10^{-2}$     | 5.60                          | 0.99988 |
|             | 3.75 | 2.67                                | 2.99                                      | 6.72                                | 2.73                                      | 4.85                          | 1.28                                      | 2.98                          | 7.07                                      | 5.76                          | 2.14                                      | $2.06 \times 10^{-2}$     | 3.99                          | 0.99991 |
|             | 4.00 | 2.70                                | 2.92                                      | 6.28                                | 2.69                                      | 4.71                          | 1.18                                      | 2.86                          | 6.47                                      | 4.29                          | 1.49                                      | $1.50 \times 10^{-2}$     | 3.09                          | 0.99993 |
|             | 4.25 | 2.37                                | 4.76                                      | 5.93                                | 4.44                                      | 4.39                          | 1.69                                      | 2.66                          | 9.80                                      | 3.46                          | 1.77                                      | $1.13 \times 10^{-2}$     | 6.22                          | 0.99985 |
|             | 4.50 | 0.53                                | 4.58                                      | 5.75                                | 4.34                                      | 3.82                          | 1.24                                      | 2.40                          | 8.15                                      | 2.96                          | 1.18                                      | $8.34 \times 10^{-3}$     | 3.60                          | 0.99991 |
|             | 4.75 | 0.24                                | 3.86                                      | 5.48                                | 3.69                                      | 3.65                          | 0.96                                      | 2.34                          | 6.29                                      | 2.36                          | 0.74                                      | $6.33 \times 10^{-3}$     | 1.86                          | 0.99995 |
|             | 5.00 | 1.00                                | 4.21                                      | 5.14                                | 4.05                                      | 3.64                          | 1.06                                      | 2.29                          | 6.63                                      | 1.82                          | 0.62                                      | $4.90 \times 10^{-3}$     | 1.84                          | 0.99995 |
|             | 5.50 | 0.00                                | 5.15                                      | 4.78                                | 5.03                                      | 3.22                          | 1.04                                      | 2.13                          | 6.61                                      | 1.23                          | 0.43                                      | $2.92 \times 10^{-3}$     | 1.32                          | 0.99996 |
|             | 6.00 | 0.00                                | 13.76                                     | 4.39                                | 13.5                                      | 3.04                          | 2.51                                      | 2.17                          | 14.45                                     | 0.79                          | 0.66                                      | $1.73 \times 10^{-3}$     | 4.62                          | 0.99984 |
|             | 6.50 | 0.00                                | 17.58                                     | 4.07                                | 17.39                                     | 3.00                          | 3.08                                      | 2.45                          | 14.02                                     | 0.48                          | 0.48                                      | $9.65 \times 10^{-4}$     | 3.17                          | 0.99988 |
|             | 7.00 | 0.00                                | 24.27                                     | 3.78                                | 24.11                                     | 2.54                          | 3.35                                      | 2.31                          | 15.49                                     | 0.37                          | 0.41                                      | $6.25 \times 10^{-4}$     | 2.44                          | 0.9999  |
|             | 7.50 | 0                                   | 0                                         | 3.53                                | 0.67                                      | 2.56                          | 1.44                                      | 2.62                          | 19.89                                     | 0.21                          | 0.20                                      | $3.34 \times 10^{-4}$     | 6.37                          | 0.99972 |
|             | 8.00 | 0                                   | 0                                         | 3.31                                | 0.41                                      | 2.02                          | 0.90                                      | 2.30                          | 16.63                                     | 0.19                          | 0.13                                      | $2.35 \times 10^{-4}$     | 2.63                          | 0.99988 |

**Table S11:** Fitting parameters for the Havriliak-Negami model for the frequency dependence of  $\chi''$  of  $\mathbf{2}_{\text{close}}$  in the solution state in a 1000 Oe field.
